# LED light gradient as a screening tool for light quality responses in model plant species

## Short Title

Screening with LED light gradient

## Authors

P. Lejeune<sup>1</sup>, A. Fratamico<sup>1</sup>†, F. Bouché<sup>1</sup>, S. Huerga Fernández<sup>1</sup>, P. Tocquin<sup>1</sup>, and C. Périlleux<sup>1\*</sup>

\*Corresponding author. Email: [cperilleux@uliege.be](mailto:cperilleux@uliege.be)

## Affiliations

<sup>1</sup> InBioS - PhytoSYSTEMS, Laboratory of Plant Physiology, University of Liège, B22 Sart Tilman Campus, 4 Chemin de la Vallée, B-4000 Liège, Belgium

† present address : GDTEch Engineering, Avenue de l'Expansion 7, B-4432 Alleur, Belgium

## Abstract

Current developments in light-emitting diodes (LEDs) technologies have opened new perspectives for sustainable and highly efficient indoor cultivation. The introduction of LEDs not only allows a reduction in the production costs on a quantitative level, it also offers opportunities to manipulate and optimise qualitative traits. Indeed, while plants respond strongest to red and blue lights for photosynthesis, the whole light spectrum has an effect on plant shape, development, and chemical composition. In order to evaluate LEDs as an alternative to traditional lighting sources, the species-specific plant responses to distinct wavelengths need to be evaluated under controlled conditions. Here, we tested the possibility to use light composition gradients in combination with semi-automated phenotyping to rapidly explore the phenotypic responses of different species to variations in the light spectrum provided by LED sources. Plants of seven different species (*Arabidopsis thaliana*, *Ocimum basilicum*, *Solanum lycopersicum*, *Brachypodium distachyon*, *Oryza sativa*, *Euphorbia peplus*, *Setaria viridis*) were grown under standard white fluorescent light for 30 days, then transferred to a Red:Blue gradient for another 30 days and finally returned to white light. In all species, differences in terms of dimension, shape, and color were rapidly observed across the gradient and the overall response was widely species-dependent. The experiment yielded large amounts of imaging-based phenotypic data and we suggest simple data analysis methods to aggregate the results and facilitate comparisons between species. Similar experimental setups will help achieve rapid environmental optimization, screen new crop species and genotypes, or develop new gene discovery strategies.

## MAIN TEXT

### 1. Introduction

Plants are sessile organisms that must rely on environmental cues to adapt their physiology and morphology to prevailing and changing conditions. Among those environmental cues, light is one of the most useful signals for plants. Not only does it fuel growth through photosynthesis, but it also brings information about the time of the day, the season, the surrounding environment, or the atmospheric conditions (1–4).

Light is perceived by photosynthetic pigments and by dedicated chromoproteins, called photoreceptors. In *Arabidopsis thaliana*, each of the five known photoreceptor families is sensitive to a specific region of the light spectrum, ranging from UV-B to near infrared (5). Through this complex sensing machinery, light quality controls multiple plant

1 developmental processes, such as germination, growth under competing canopies, root  
2 development, and flowering (6–8). Photoreceptors are integrative triggers ensuring a fine-  
3 tuned response to the whole light spectrum (9, 10), while also interacting with hormonal  
4 pathways to coordinate plant growth and development (11, 12). Moreover, there is an  
5 interplay between the signaling function of light, which is efficient even at very low  
6 irradiances, and its energetic function in photosynthesis, since some of the responses  
7 triggered by photoreceptors have a direct impact on photosynthesis efficiency (leaf  
8 inclination, leaf flattening, chloroplast movement), carbon metabolism, biomass production,  
9 and stress responses (13–17).

10 In semi- or fully-controlled production environments, such as greenhouses or indoor farms,  
11 light is a limiting factor for crop and fruit yields. The use of supplemental artificial lighting  
12 is thus necessary in northern regions, especially in winter when shorter photoperiods and  
13 lower light intensities severely impact productivity (18). Moreover, with the continuous  
14 growth of the world population, artificial lighting is increasingly needed to support the  
15 growing demand for local food production in the emerging indoor urban farming  
16 infrastructures (19). During the last two decades, the improvement in the efficiency of light-  
17 emitting diodes (LEDs) has been the main driver in the development of these plant factories  
18 (20, 21). Given the high rate at which their luminous efficiency increases and their cost  
19 decreases, LEDs should soon outperform all other technologies for providing supplemental  
20 lighting in greenhouses (18, 22).

21 LEDs were invented in the 1960s and the range of available wavelengths has grown steadily  
22 since. The red and blue LEDs were the first whose efficiencies were sufficient for  
23 horticultural applications, and the fact that these wavelengths are the most efficient for  
24 photosynthesis obviously facilitated their adoption (23, 24). It was often shown that  
25 photosynthesis and growth benefit from a high Red:Blue ratio (17, 25–27), as expected from  
26 their respective quantum yield (28). However, thanks to the increase in available LED  
27 wavelengths, further studies revealed very complex responses to variations in the light  
28 spectrum. For instance, green and far-red wavelengths, which were initially neglected  
29 because of their low contribution to the action spectrum of photosynthesis, were shown to  
30 have a stimulating effect on photosynthesis in some conditions and could thus be useful to  
31 fine-tune crop and fruit productions (29–31). Moreover, because LED-based lightings  
32 enable the creation of “light recipes” by mixing and modulating an increasing number of  
33 available wavelengths, the trend is now to develop smart lighting applications (32). The  
34 goals are not only to fine-tune photosynthesis, growth and yield more efficiently, but also  
35 to improve the quality of crops by manipulating their secondary metabolism (33–36).

36 Given the extremely complex and species-dependent nature of light responses, comparing  
37 discrete experimental conditions would restrict the exploratory field and limit the  
38 significance of the results. Here, we screened the phenotypic responses of a panel of species  
39 to a Red:Blue gradient in order to maximize our understanding of the effect of varying ratios  
40 of these wavelengths across flowering plants. We chose to characterize seven model plants,  
41 based on their scientific and economical importance as well as their botanical diversity. We  
42 selected four dicot species: *Arabidopsis thaliana* (Brassicaceae), an obvious choice due to  
43 its popularity in academic research and the wealth of genomic and phenomic knowledge,  
44 *Solanum lycopersicum* (Solanaceae) and *Ocimum basilicum* (Lamiaceae), two interesting  
45 models for horticultural applications, as well as *Euphorbia peplus* (Euphorbiaceae), a wild  
46 species studied for its medicinal properties. We also selected three monocot model species  
47 (Poaceae): one tropical crop, *Oryza sativa*, one temperate species, *Brachypodium*

1 *distachyon*, and finally one C4 wild species that is increasingly used in fundamental  
2 research, *Setaria viridis*.

3 Efficient phenotyping is another bottleneck for implementing LEDs into crop management  
4 and breeding applications. Over the last two decades, numerous publications have described  
5 novel phenotyping approaches to suit ever increasing fields of application. Technologies  
6 were developed to adjust the level of desired throughput, diversity, and scale of measured  
7 traits (i.e. cell, organ, plant, and canopy levels), to adapt to the plant growth facilities (e.g.  
8 field, greenhouse, indoor cabinets), and to serve various experimental aims (e.g. genomics,  
9 breeding, precision agriculture, screening of chemicals or bioactive compounds). These  
10 aspects have been extensively discussed in recent reviews (37–39). Imaging-based systems,  
11 thanks to their non-invasiveness and amenability to automation, have been increasingly used  
12 to measure plant traits since the late 1990s (40, 41), enabling the rapid collection of  
13 phenotypic data from larger populations of plants and at lower cost compared to manual  
14 approaches. Numerous variations of digital imaging setups have been developed with  
15 success to tackle a variety of applications and scientific questions (42). The implementation  
16 of a phenotyping pipeline implies numerous and inevitable compromises between the scope,  
17 the desired quality, the timelines, and the available budget. Commercial ready-to-use  
18 solutions are available for high-throughput, high-resolution, highly automated imaging  
19 platforms but they are still expensive due to the niche market and the high degree of  
20 customization. However, it is possible to construct simple low-cost imaging stations with  
21 sufficient image quality and speed, using off-the-shelf electro-mechanics, cameras,  
22 software, and open-source analysis tools (43–45). Here, we assembled an in-house, simple,  
23 and cost-efficient RGB imaging setup in order to capture basic but precise and reproducible  
24 biometrics (e.g. plant dimensions, shape factors, color indices) that enabled us to quantify  
25 the effects of LED lighting on the phenotype of selected plant species.

## 26 **2. Materials and Methods**

### 27 2.1. Experimental and Technical Design

28  
29 Figure 1 summarizes the experimental workflow. Seedlings were first grown for 30  
30 days in small Jiffypots® under “normal” white light before being transplanted in standard  
31 12-cm pots and transferred under a Red:Blue gradient. The purpose of starting the  
32 cultivation under white light was to avoid mixing the effects of light quality on germination  
33 and seedling establishment with its effects on later growth. After 30 days under the gradient,  
34 plants were re-transferred to white light. For each species, a group of plants was kept  
35 continuously under white light as a control. The light spectrum was recorded for each  
36 individual plant under the gradient conditions and white light. The Red:Blue ratio  
37 ( $\text{PFD}_{\text{Red}}(600-700\text{nm})$  over  $\text{PFD}_{\text{Blue}}(400-500\text{nm})$ ) was calculated for individual plants based  
38 on the spectral light measurements performed at each plant position at the beginning of the  
39 gradient treatment. Plants were imaged every 3-4 days during the gradient treatment and  
40 after return to white light. Three types of phenotypic measurements were derived from the  
41 images: dimensions, shape factors, and color indices. These measurements were used to  
42 estimate the variation of plant size, morphology, and pigmentation along the Red:Blue  
43 gradient and across time. The leaf chlorophyll content was measured at the end of the  
44 gradient treatment. Data processing and analysis followed as described in section 2.6.

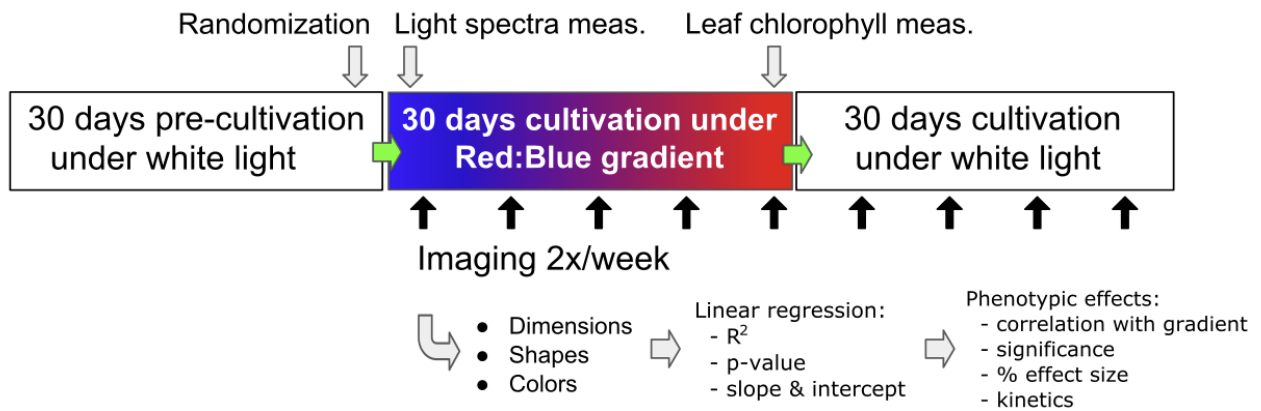

1  
2  
3  
4  
5  
6  
7  
8  
9  
10  
11  
12  
13  
14  
15  
16  
17  
18  
19  
20  
21  
22  
23  
24  
25  
26  
27  
28  
29  
30  
31  
32  
33  
34  
35  
36  
37  
38  
39

**Figure 1.** Experimental workflow.

## 2.2. Plant materials

*Arabidopsis thaliana* Col-0 seeds were obtained from a public seedbank (NASC, Nottingham, UK) and *Brachypodium distachyon* Bd21-3 seeds from Prof. R. Amasino (University of Wisconsin, USA). Seeds of *Euphorbia peplus* were obtained from fairdinkumseeds.com (Queensland, Australia). Seeds of *Setaria viridis* A10.1 were obtained from the USDA Iowa State University Agricultural Research Service (Ames, IO, USA). Seeds of *Solanum lycopersicum* cv. Ailsa Craig were obtained from TGRC (Davis, CA, USA). *Ocimum basilicum* cv. Genovese seeds were obtained from Le Jardin de Bellecourt (Bellecourt, Belgium). Seeds of *Oryza sativa* cv. Nipponbare were obtained from IRRI (Los Baños, Laguna, The Philippines).

## 2.3. Growth conditions

**Germination:** Seeds were sown in 4.5 cm fiber pots (Jiffypots®, Jiffy, Zwijndrecht, The Netherlands) filled with a 4:1 (vol:vol) mix of leaf mould and baked clay granules. The fiber pots were placed on 120 x 18 x 14 cm cultivation gutters (Goponic, Nouméa, France) and irrigated by capillarity through a wet cultivation felt mat (Feutriplanta®, Jardirama, Warsage, Belgium). The felt mat was kept continuously moist with felt wicks dipping in the water through holes (one every 10 cm) in the decks of the gutters (Figure 2). This capillarity system provides “on-demand” irrigation and avoids water excess or substrate compaction problems. The gutters were placed for 30 days in a Conviron PGV36 growth room (Conviron, Winnipeg, Canada) at 21°C day/night, 70% relative humidity, 12-h photoperiod, at an irradiance of  $\pm 130\text{-}150 \mu\text{E}\cdot\text{m}^{-2}\cdot\text{s}^{-1}$  provided by Sylvania Luxline Plus T5 FHO 54W tubes (Osram-Sylvania, Wilmington, MA, USA) delivering 4000K white light. Depending on the species, germination started between 1 and 2 weeks after sowing.

**Plant Growth:** After the initial 30 days under white light, Jiffypots® with weak or abnormal plantlets were discarded and the others were transplanted into 12-cm square plastic cultivation pots filled with 1.5 L of leaf mould and baked clay (4:1) mixed with 6 gr.L<sup>-1</sup> of slow release fertilizer (Osmocote Exact Standard 5-6 M, ICL Specialty Fertilizers). The pots were fitted at the bottom with a 2 x 10 cm felt wick and randomly placed on the deck of the cultivation gutters described above. The gutters were placed in Conviron PGV36 growth rooms under the same conditions than during germination, except for the lighting which was provided either by white fluorescent tubes (same type as above) or by adjustable 16 channels LED luminaries (described below). Each room had a 1.3 x 2.4 m (3 m<sup>2</sup>) cultivation area, allowing 12 gutters of 10 pots. The placement of the plants was organized in rows and columns so that each pot could be registered by Room:Row:Column coordinates

1 and labelled with a unique QR-code. We used three contiguous rows per species, except for  
2 *Arabidopsis* that had four rows. A randomization step was performed for each species within  
3 the block of three rows to avoid any bias while placing the transplanted pots in the rooms.  
4 Right after transplantation, we only kept one plant per pot, except for *E. peplus* (6 plants/pot)  
5 and *O. basilicum* (up to 9 plants/pot) to account for their usual mode of cultivation in bushes.

6 After transplantation (day 30), the plants were taken out of the growth rooms twice  
7 a week for imaging and placed back at the same location. On day 60, all plants were  
8 transferred to white light conditions, grown and imaged for at least two more weeks. Beyond  
9 that point, plants of a given species were discarded if more than 50% were showing signs  
10 of flowering. After 30 days under white light, the experiment was stopped.

#### 11 2.4 Spectrally adjustable LED lightings.

12 Three phytotronic cabinets were equipped with 15 Lumiatec PHS :: 16 (300W)  
13 luminaries (GDTech, Alleur, Belgium) each. These luminaries are controllable over 16  
14 independent channels (2x blue 455 nm, 6x white 4000K, 1x green 520 nm, 1x yellow 593  
15 nm, 2x red 635 nm, 2x hi-red 660 nm, 1x far-red 730 nm, and 1x UV 280 nm) of 6 LEDs  
16 each. The 15 luminaries were regularly distributed as a 5 x 3 pattern at a distance of 45 cm  
17 between each other in order to guarantee optimal spectral homogeneity in the 3 m<sup>2</sup> culture  
18 area (Figure 2). The luminaries were controlled per clusters of 3 using the Lumiatec control  
19 interface and the Blue and Red channels were adjusted as shown in Figure 2b in order to  
20 create a gradient of Red:Blue ratio (Figure 2d). The light spectrum and intensity across the  
21 growth chambers were monitored using a HiPoint HR-550 spectrophotometer (TAIWAN  
22 HIPOINT CORP., Kaohsiung, Taiwan).  
23  
24



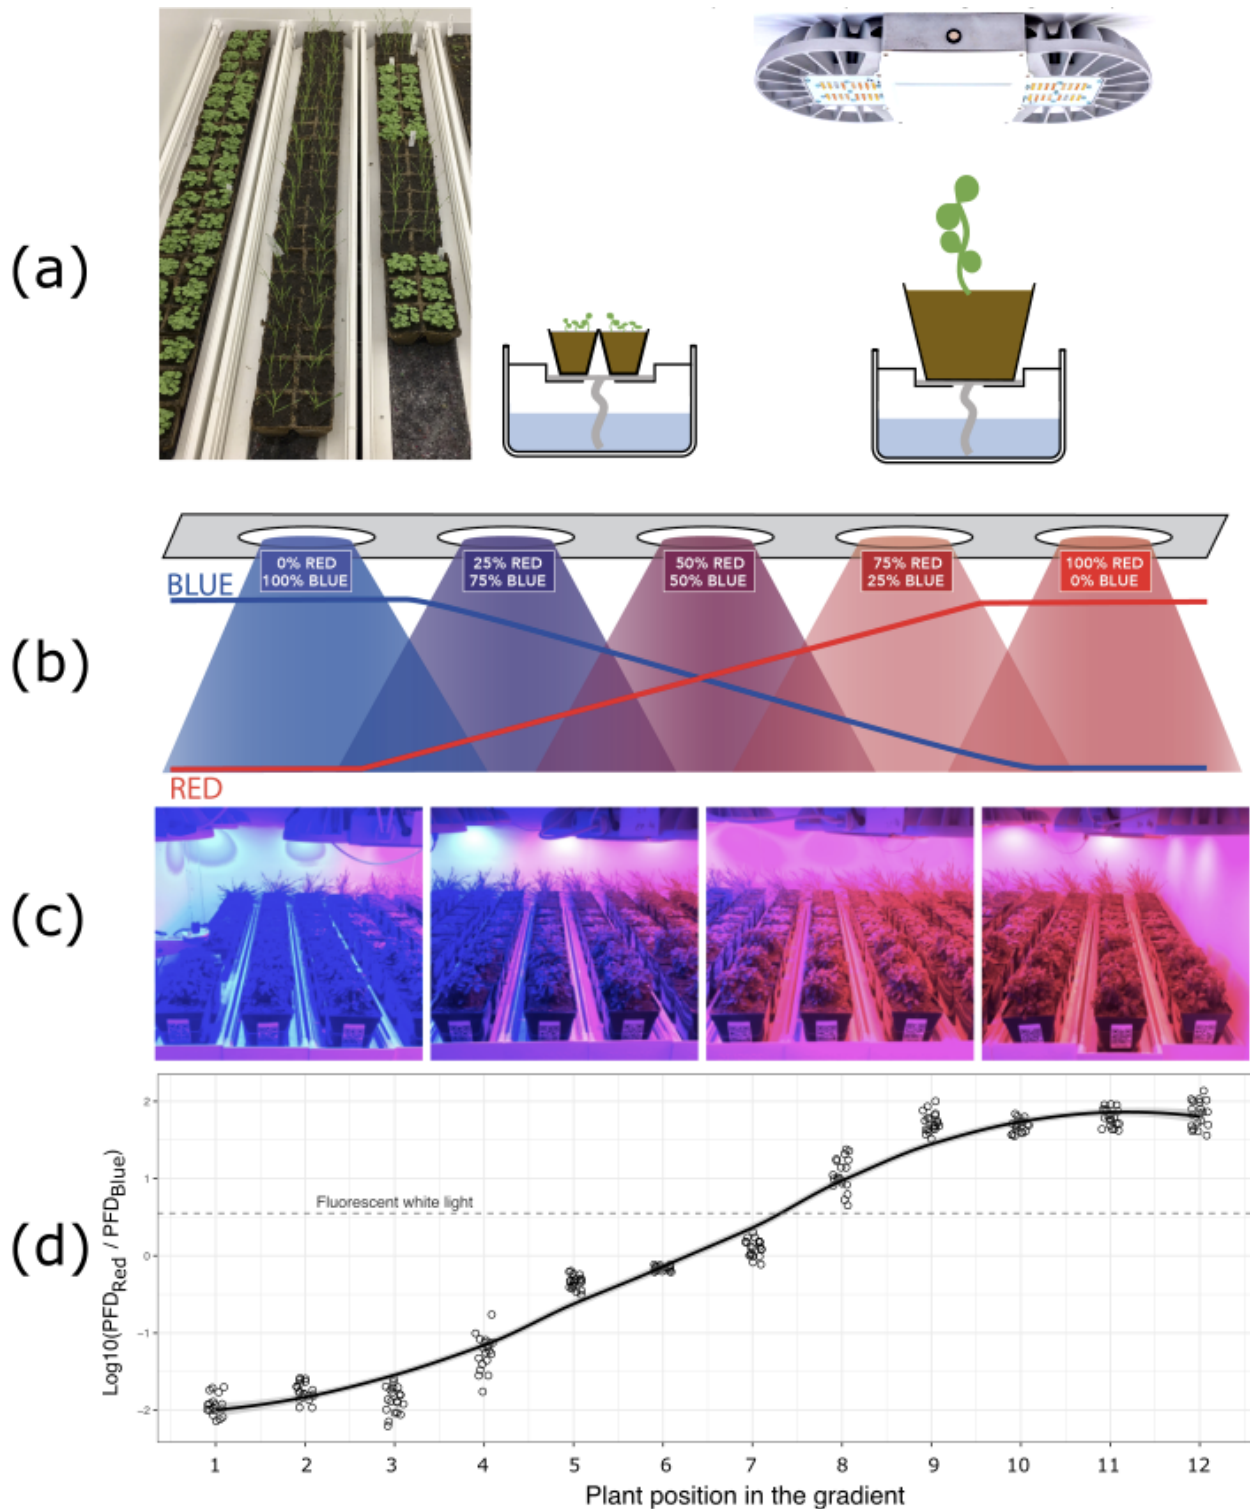

1  
2  
3  
4 **Figure 2.** Experimental cultivation setup under the Red:Blue light gradient.  
5 (a) Left: 30-day-old plantlets growing in 4.5 cm fiber pots (Jiffypots) inside cultivation  
6 gutters lined with felt mats and wicks absorbing water. Right: cultivation system after  
7 transplantation in 12-cm pots under the Lumiatic LED luminaries. (b) Red:Blue gradient  
8 setup. Arrangement and setting of the 5 clusters of 3 LED luminaries in the phytotronic  
9 cabinet. (c) View of the phytotronic cabinet during the experiment. (d) Red:Blue ratio  
10 measured at each plant position. PFD = Photon Flux Density. Picture of the luminary in (a)  
11 is a courtesy of Araponics (Liège, Belgium, <https://www.araponics.com/grow-lights/63-phs16.html>).

## 2.5 Phenotyping platform, imaging process, and data analysis

Phenotypic data were collected twice a week using an in-house imaging cabinet (Figure 3). The setup was built with aluminum profiles supporting white PVC walls. The cabinet was illuminated by 25 x 25 cm white light LED panels (Araponics, Liège, Belgium). Lighting was optimised for taking pictures with a diffusive back-lit white background for side-view images and a black cloth background for top-view images. A step-motor platform was used to rotate the plants while two CMOS RGB 12 Mpx industrial cameras (Dalsa Genie-nano 4040, Dalsa, Waterloo, Canada) acquired plant images and one color HD webcam (Logitech, Lausanne, Switzerland) read QR-coded labels on the pots. The Genie-Nano cameras were fitted with high resolution 25-mm focal length Tamron M111FM25 lenses, which allowed to image plants up to 150-cm high and 100-cm wide with an estimated smallest detail size of +/- 0.5 mm at a working distance of 200 cm, based on sensor dimensions (14.2 x 10.4 mm, 4112 x 3008 pixels) and lens optical resolution (3.1  $\mu\text{m}$  “pixel pitch”). Diaphragm closure of the lenses was set to F8.0, exposure time to 0.2 msec and gain to 6. A blueprint of the imaging setup is provided as supplementary material (Figure S1).

The cameras and the stepper-motor were controlled through a dedicated software written in Python and running on a Linux computer in order to synchronize plant identification, rotation, and image acquisition. The adjustment of basic camera settings (e.g. shutter speed, gain, output format) used libraries from OpenCV (<https://pypi.org/project/opencv-python/>) and Aravis (<https://github.com/AravisProject/aravis>) while rotation functionalities (i.e. speed, number and time of acquisitions after QR-code detection) was programmed by us. Typically, six side-view images and one top-view image were acquired during a 180° rotation in 4 seconds (45° per sec.). The plants were manually loaded on the rotating platform through a sliding door, which was closed before imaging. After rotation was initiated, the imaging cycle started when the QR-code identifier was read by the webcam, and each image acquired by the Genie-Nano cameras was saved under a unique ID. After each imaging, a preview of the images allowed a quick visual check and, in case of a problem, a second imaging cycle was performed. The complete imaging cycle was about 10 seconds per plant, allowing to image the complete set of 348 pots included in this experiment in less than half a day.

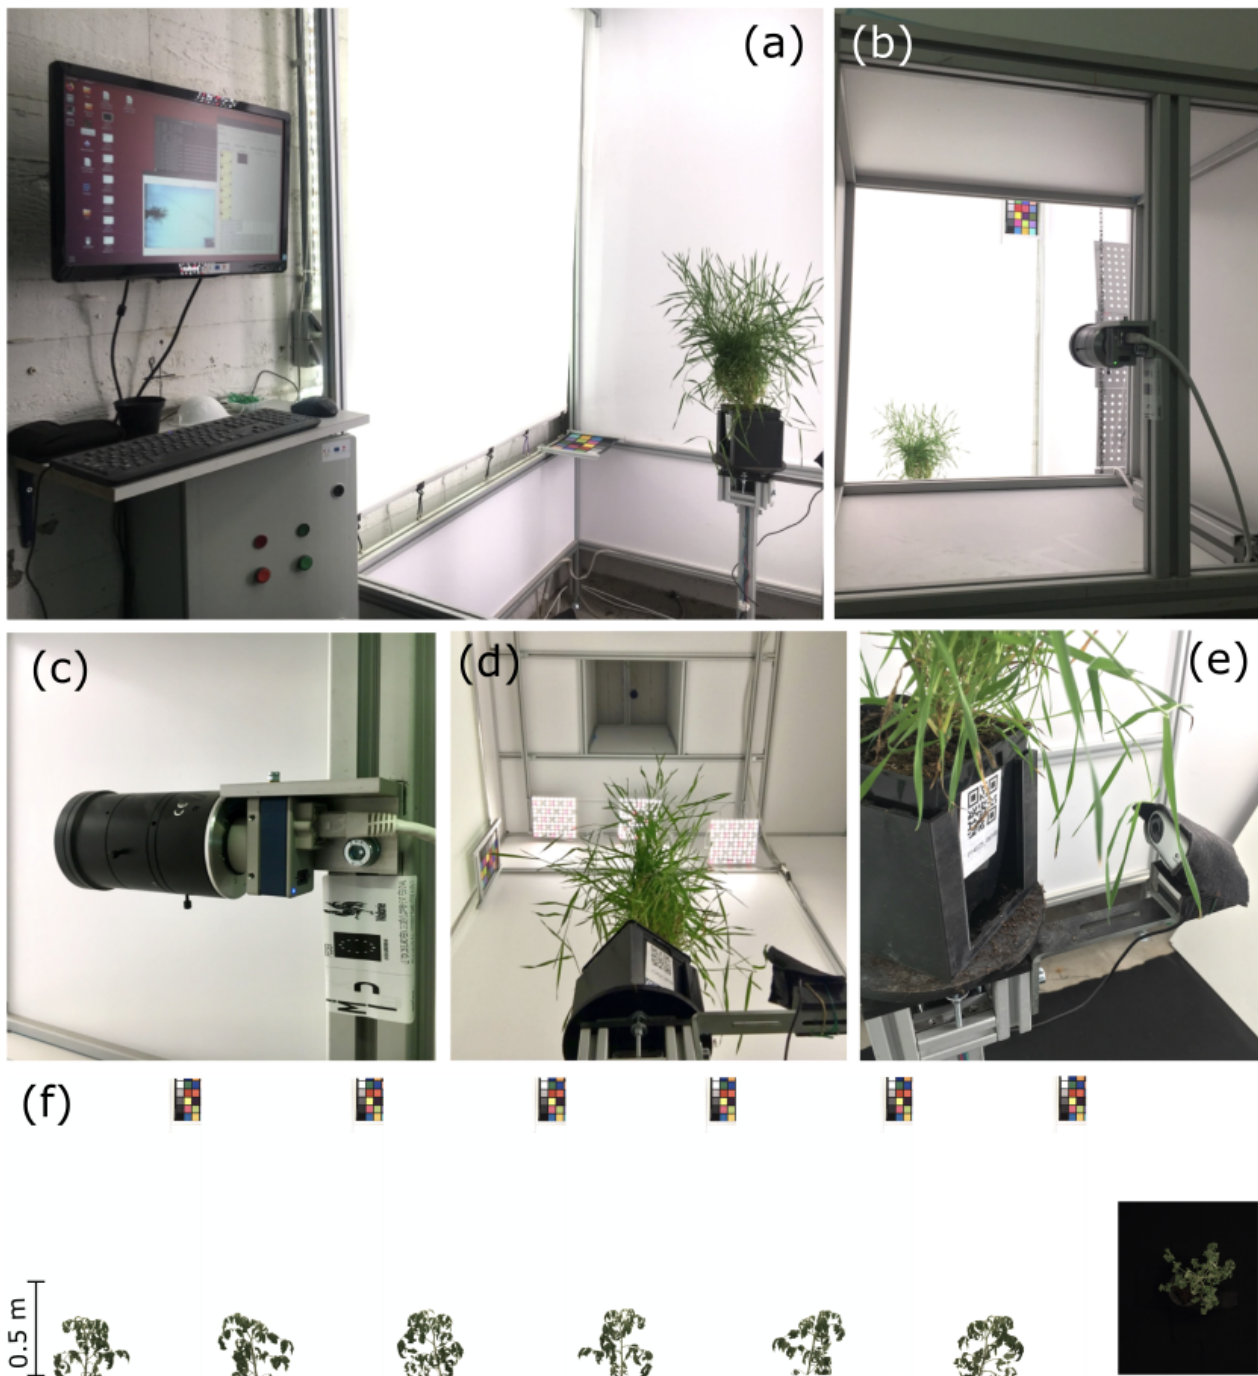

1  
2  
3  
4  
5  
6  
7  
8  
9  
**Figure 3.** Views of the imaging cabinet including (a) the acquisition interface, (b,c) the side-view camera, (d) the rotating platform and the top-view camera, and (e) the QR-code reading webcam (bottom right). Typical images (f) obtained with the system including 6 side-views obtained by rotating the plant (white background) and one top-view (black background). A reference color chart was used to calibrate the images (upper right corner in the side-view images, not shown for the top-view image).

10  
11  
12  
13  
14  
The image acquisition software saved each image under a unique ID. An automated processing script was developed using the macro language of the ImageJ open source image processing package (Fiji distribution) (46). This script was used to extract plant phenotypic descriptors from each image through a fully automated process, including the following steps: i) read the raw image in bayer format, ii) get the metadata (e.g. date, plant ID, camera



1 view, frame number), iii) perform white balance and spatial calibration based on a reference  
2 color chart, iv) segment the plant from background using grey-scale or color thresholding,  
3 v) measure plant dimensions and shape factors, vi) extract color components in either RGB  
4 or HSB color space, vii) export raw data in text format (.csv).

5 A more detailed description of the image processing is available as supplemental  
6 material (Table S1).

7 The output data included three types of phenotypic descriptors: i) simple dimensions  
8 (e.g. Height, Width, Projected Area, Fitted Ellipse), ii) shape factors derived from  
9 dimensions (e.g. Roundness, Solidity, Circularity), and iii) color density and variation  
10 values (Red, Green, Blue, Hue, Saturation, Brightness, and their respective standard  
11 deviations). For each species and timepoints, these parameters were saved into separate text  
12 files that were ultimately combined into one large dataset.

## 13 2.6 Data processing and analysis

14 R version 3.6.1 for macOSX (available at <https://cran.r-project.org/bin/macosx/>)  
15 running under Rstudio version 1.0.136 (Rstudio, Boston, MA, USA) was used to : i)  
16 compute additional shape factors as ratios from existing measurements, such as Voxel,  
17 Compactness, Anisotropy; ii) compute color indices such as Green Leaf Index (GLI), and  
18 Triangular Greenness Index (TGI); iii) generate a chlorophyll content prediction based on  
19 RGB values; iv) generate scatter plots to visually check for abnormal measurements (e.g.  
20 corrupted images) before further statistical use; v) aggregate the multiple camera  
21 measurements per plant (e.g. the side view camera generated 6 images from which the mean,  
22 maximum, minimum, and median values were computed); vi) merge imaging data with  
23 plant metadata (species, spatial location, light intensity and quality at plant location,  
24 measured chlorophyll content); vii) evaluate species discrimination based on Principal  
25 Component Analysis (PCA); viii) apply linear regression to quantify the effect of the  
26 Red:Blue gradient on each phenotypic parameter at successive timepoints.

27 A detailed description of the phenotypic descriptors and how they were calculated  
28 is available as supplemental material (Table S2).

29 For side-view data, since there were 6 different images per plant, we had to choose  
30 whether to use the mean, the median, or another statistics. After some testing we decided to  
31 use the mean of the 6 images, except for the parameters Height and Width for which we  
32 used the maximum values.

33 At each timepoint, and for every measured parameter, linear regression with the  
34 Red:Blue ratio was used to generate correlation coefficients such as Pearson R, p-value,  
35 slope, and intercept. We decided to use the simplest possible linear model ( $y = a \cdot x + b$ ) to  
36 estimate the “effect size” of the gradient as the percentage of the difference across the  
37 Red:Blue gradient (Effect size (%) =  $(\text{value at max PFD}_{\text{Red}}:\text{PFD}_{\text{Blue}} - \text{value at min PFD}_{\text{Red}}:\text{PFD}_{\text{Blue}}) / \text{value at min PFD}_{\text{Red}}:\text{PFD}_{\text{Blue}} * 100$ ). The slope and the intercept were  
38 used to compute value estimates for each phenotypic parameter at the minimal and the  
39 maximal Red:Blue ratios (value estimate = slope x  $\text{Log}_{10}(\text{PFD}_{\text{Red}}:\text{PFD}_{\text{Blue}})$  + intercept).

## 40 2.7 Chlorophyll content measurements

41 The leaf chlorophyll content was estimated with an Apogee MC-100 (Apogee  
42 Instruments, Logan, UT, USA). Built-in calibration models were used for tomato and rice,  
43 whereas the built-in generic model ([https://www.apogeeinstruments.com/content/MC-100-](https://www.apogeeinstruments.com/content/MC-100-manual.pdf)  
44 [manual.pdf](https://www.apogeeinstruments.com/content/MC-100-manual.pdf)) was used for the other species. At least 6 measurements were made on  
45  
46  
47

1 minimum 3 different mature leaves per pot. The area of measurement was located on the  
2 most horizontal part of the limb, which was the most exposed to light, and the measurements  
3 were distributed across its width. The measurements were averaged per pot.  
4

### 5 3. Results

#### 6 3.1. Phenotypic discrimination of species based on image data

7 Seven different species were grown under a gradient of Red:Blue light. Four species were  
8 dicots, of which one rosette (*A. thaliana*), one caulescent (*S. lycopersicum*) and two bushes (*E.*  
9 *peplus* and *O. basilicum*). The three other species were monocots, all tillering rosettes with erect  
10 leaves (*O. sativa*, *B. distachyon*, *S. viridis*). Changes in growth, morphology and color were  
11 recorded, based on plant imaging every 3-4 days. Three types of phenotypic descriptors were  
12 collected: i) dimension, ii) shape factors, iii) color indices. For each type of descriptor, different  
13 proxies were extracted from images captured from both top- and side-view cameras (see the  
14 Materials & Methods section for more details).

15 In order to evaluate the performance of our phenotyping setup and to select the most  
16 discriminant plant features, PCA analyses were performed using either dimension, shape factors,  
17 or color indices only, or all parameters together (Figure 4). Imaging data collected over 3 timepoints  
18 between 21 and 29 days after transfer under Red:Blue gradient were used to generate the PCA  
19 plots.

20 The different species can be discriminated based on simple dimension features (Figure 4a),  
21 except *E. peplus* and *O. basilicum* that overlap completely. Shape factors alone neither separate  
22 clearly *B. distachyon* from *S. viridis* nor, again, *E. peplus* from *O. basilicum* (Figure 4b). Color  
23 indices alone do discriminate rather well the 3 dicots but not so much the 3 monocots (Figure 4c).  
24 When all 3 types of parameters are combined, a much better separation can be achieved with  
25 monocots and dicots clearly pulled apart in opposite sectors of the PCA plot (Figure 4f). Finally,  
26 Figures 4d-e show that using only top-view or only side-view data yields different separations, e.g.  
27 *E. peplus* and *O. basilicum* separate well with top-view traits but not with side-view traits, while  
28 the opposite stands true for *O. sativa* and *B. distachyon*. Therefore, both side- and top-views are  
29 needed to achieve the best discrimination. Note also that *A. thaliana* data show greater variation  
30 than the other species for shape factors (Figure 4b) and side-view traits (Figure 4d). This can be  
31 explained by bolting occurring in the time-course of the experiment and affecting shape factors  
32 such as Anisometry and Circularity, which are sensitive to changes in overall symmetry and  
33 elongation. For this reason, side-view data for *A. thaliana* were not used in the following analyses.  
34

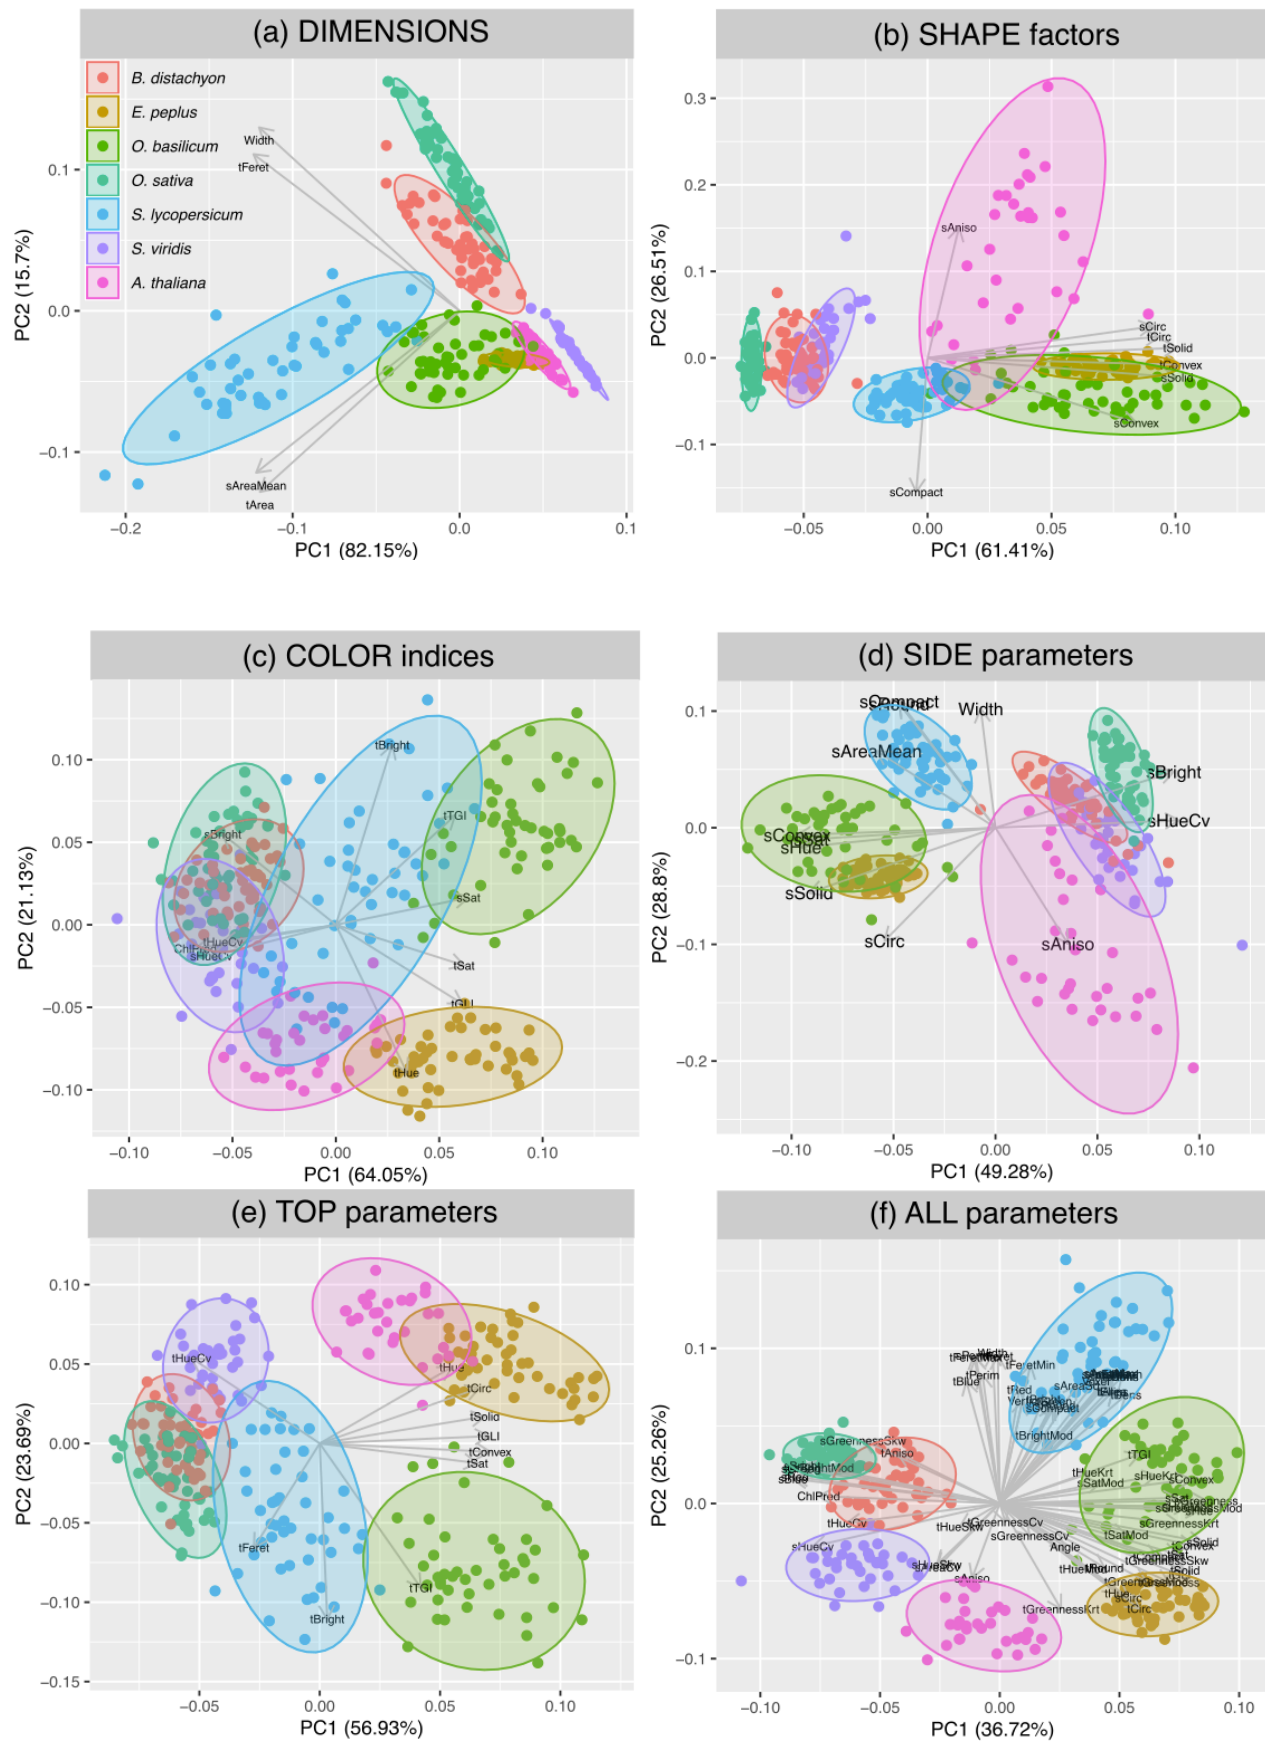

**Figure 4.** Principal Components Analysis discrimination of seven species based on various selections of measured parameters. Species color codes are shown in panel (a).

### 3.2. Gradient effects on plant phenotypes

The Red:Blue ratio ( $\text{PFD}_{\text{Red}}[600-700\text{nm}]$  over  $\text{PFD}_{\text{Blue}}[400-500\text{nm}]$ ) was calculated for individual plants based on the spectral light measurements performed at each plant position at the beginning of the gradient treatment. For plants growing under white light, it was calculated from an average of several measurements. The Red:Blue ratio affected the three types of phenotypic descriptors that we measured - dimension, shape and color - but at various extent and sometimes in opposite directions in the different species. Figure 5 shows two examples of eye-perceptible effects. *S. lycopersicum* plants (photographed 20 days after start of the gradient treatment) were clearly taller and wider as the Red:Blue ratio increased, due to stem and petiole elongation. These phenotypes were detectable with dimension and shape proxies, as described below, but also with color changes due to more stem and petiole parts being exposed. By contrast, no clear effect on rosette size was detected in *A. thaliana* plants (photographed 12 days after start of the gradient treatment) but its shape was changed due to curling of the leaf margins under exposure to Red light (Figure 5, panels (e) and (f)). No color change was perceptible by eye.

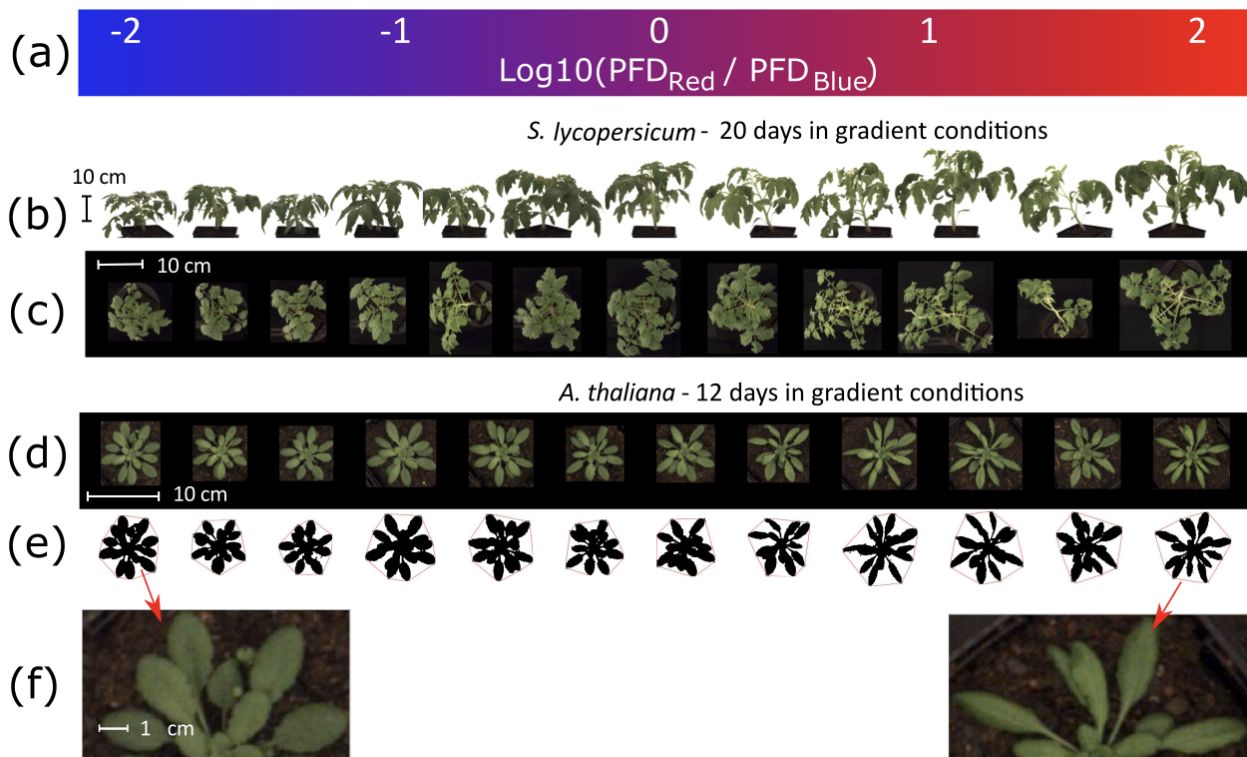

**Figure 5.** Example of plant phenotypes under the Red:Blue gradient. (a) light gradient, (b) side-view images of a row of *S. lycopersicum* plants, (c) top-view images of the same *S. lycopersicum* plants, (d) top-view images of *A. thaliana* plants, without thresholding, (e) same images of *A. thaliana* plants, after thresholding (red line is the convex hull of the object), (f) enlarged images of the *A. thaliana* plants on each extreme side of the gradient.

The effects of the light gradient were quantified by plotting phenotypic measurements versus the logarithmic value of the Red:Blue PFD ratio, calculating linear regressions, and computing correlation coefficients ( $R^2$ , p-value, slope, and intercept).

Figure 6 shows examples of such linear regressions for a few parameters that responded strongly to the Red:Blue ratio. These examples show that the responses may be different between



1 species, even sometimes opposite. For example, plant height increased with higher Red:Blue ratio  
2 in most species, except in *O. basilicum* and *S. viridis*. Projected leaf area measured with top-view  
3 imaging was also correlated with increased Red:Blue ratios in two species, *B. distachyon* and *E.*  
4 *peplus*, while the other species showed little or no significant change. Circularity, a shape factor  
5 that quantifies Area:Perimeter variations, was decreased under higher Red:Blue in at least two  
6 species, *E. peplus* and *S. lycopersicum*, but increased in *O. basilicum*. In *E. peplus* and *S.*  
7 *lycopersicum*, this was likely due to stem and petiole elongation, which reduced leaf overlaps and  
8 thus created gaps in the canopy, therefore reducing Circularity that is sensitive to the number and  
9 size of concavities in the contour of the measured object. On the contrary, in *O. basilicum*, such  
10 gaps were present but decreased as leaves grew.

11 The triangular greenness index (TGI) increased with higher Red:Blue ratios in all species  
12 except in *O. sativa*. TGI is a calculation based on Green reflectance relative to Red- and Blue- and  
13 has been reported to be negatively correlated to chlorophyll content (47). This negative correlation  
14 is explained by the fact that when chlorophyll concentration increases, leaves appear darker and  
15 hence reflectance values decrease. The effect of the gradient on TGI was coherent with leaf  
16 chlorophyll content measured with a chlorophyll meter in 5 out of the 7 species (Figure 6). The two  
17 exceptions were *O. sativa*, where both TGI and chlorophyll content decreased with the Red:Blue  
18 ratio, and *S. viridis*, where the chlorophyll content increased with the Red:Blue ratio while the TGI  
19 showed little variation. The decoupling of TGI and chlorophyll in these two species might be due  
20 to color changes involving other pigments or could be explained by a shape effect affecting leaf  
21 reflectance. Another surprising observation in Figure 6 is the effect of the Red:Blue gradient on the  
22 chlorophyll content of *S. viridis*, which is completely opposite to what was observed in the other  
23 species. Since *S. viridis* is the only C4 species in the experiment, it is tempting to suggest that C4  
24 and C3 plants might differ in their response to the light spectrum. Finally, it can be seen in Figure  
25 6 that the plants growing under standard white light sometimes differed phenotypically from plants  
26 grown under LEDs at the same Red:Blue ratio. For example, in *E. peplus*, all measurements shown  
27 in Figure 6 under white light are outside the confidence interval of the Red:Blue gradient. These  
28 observations clearly indicate that plant phenotype under the white light conditions was affected by  
29 other factors than the Red:Blue ratio, but to various extent in different species.

30

1

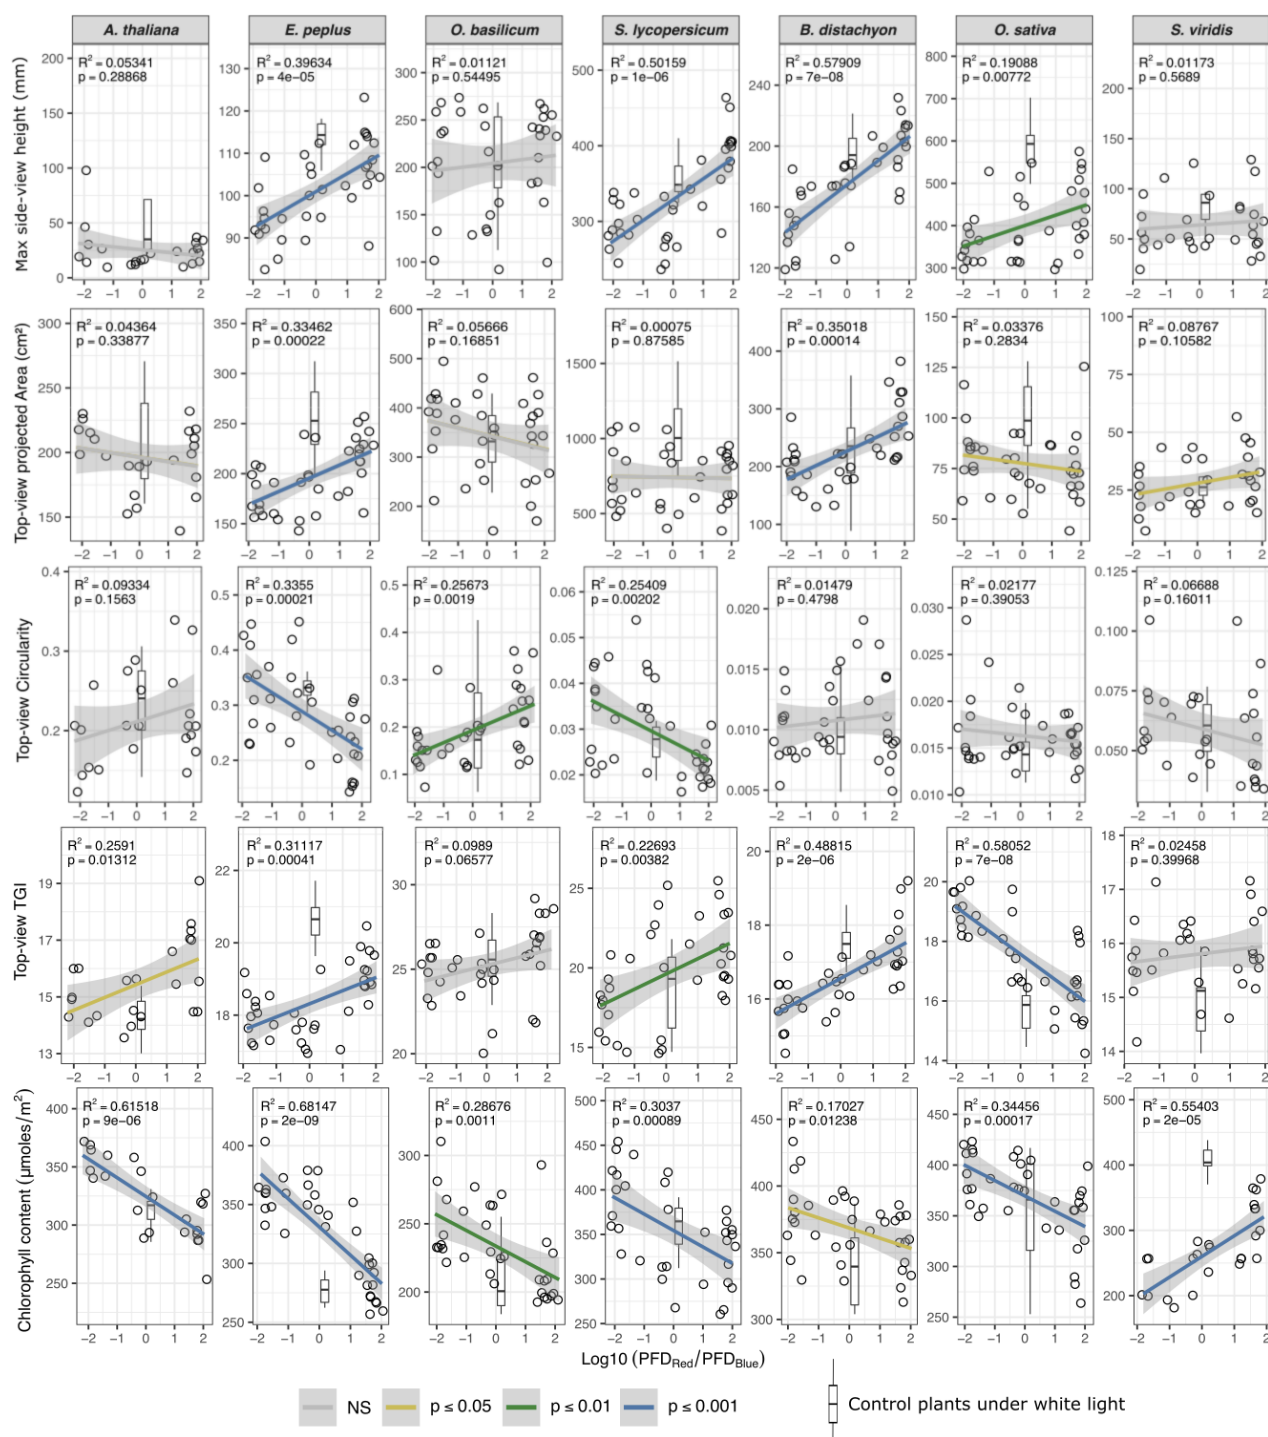

2

3

**Figure 6.** Examples of linear regressions between the phenotypic traits measured 29 days after the start of the gradient treatment and the Red:Blue ratio. Each point is an individual pot with one plant (*A. thaliana*, *S. lycopersicum*, *B. distachyon*, *O. sativa*, *S. viridis*) or one bush of several plants (*O. basilicum*, *E. peplus*) (see Materials and Methods). Greyed areas are 95% confidence intervals. Boxplots represent minimum and maximum values (whiskers), median (horizontal line), first and third quartiles (box).

10

11

12

As described in section 2.6, we summarized the bulk of phenotypic data by performing, at each time point and for each species, regression analyses for every phenotypic descriptor versus the

1 Red:Blue ratio and extracted the coefficients  $R^2$ , p-value, slope, and intercept. Then, we computed  
2 phenotypic values at the lowest and highest Red:Blue ratios using the slope and intercept of the  
3 regressions to evaluate the size of the gradient effect. In Figure 7, effect sizes are presented as the  
4 relative difference (% effect) between the extreme sides of the gradient after 29 days. In this figure,  
5 we selected 20 parameters, out of >30 measured, for which a highly significant correlation ( $p < 0.01$ )  
6 with Red:Blue ratio was found in at least one species. Note that the sign of the effect size is arbitrary  
7 since it is determined by the direction of the Red:Blue gradient. A figure presenting the  
8 corresponding  $R^2$  values is also available as supplemental material (Figure S2).

9 In terms of plant size, a correlation between plant dimensions (Area, Height, Width) and  
10 higher Red:Blue ratios was clearly seen in all species, except in *O. basilicum*. In *A. thaliana* and *S.*  
11 *viridis*, the changes did not reach significance, possibly due to higher variability or, in the case of  
12 *A. thaliana*, due to maximum size of the rosette being reached in all conditions.

13 The variations in the measured shape descriptors were more complex, with species-specific  
14 patterns. Here we focused on 3 parameters that respond to different “behaviors” : i) Roundness as  
15 defined in ImageJ is the ratio between the fitted ellipse’s minor and major axes and decreases with  
16 elongation, ii) Circularity is the ratio of the object’s area to the area of a circle having the same  
17 perimeter and decreases as concavities increase, but is relatively insensitive to contour roughness,  
18 iii) Solidity is the ratio of the object’s area to the convex-hull area and decreases with rough  
19 contours and holes.

20 In *A. thaliana*, *S. viridis*, and *B. distachyon*, no or very few significant changes could be  
21 recorded amongst the 3 selected shape descriptors, while in the other four species we observed clear  
22 effects, as illustrated in Figure 8. The main effects of the Red:Blue ratio on plant shapes were : i) a  
23 strong increase of Circularity in *O. basilicum* due to the stems of the bush being more tight together,  
24 ii) a decrease of Circularity in *S. lycopersicum*, for both side and top view images, likely caused by  
25 stem and petiole elongation, and also in *E. pepplus*, but only in the side-view images, iii) decreased  
26 Roundness and Solidity with more erect leaves in *O. sativa*. Note that in this species, Circularity  
27 values are very low because of the very narrow leaves, making this parameter less reliable.

28 Finally, changes in the color indices seemed more consistent across the panel of species: i)  
29 the two greenness indices, TGI and GLI, increased with higher Red:Blue ratios, with the notable  
30 exception of *O. sativa*; ii) the coefficient of variation for Hue recorded from the side-view picture  
31 decreased with the Red:Blue ratio, though not always significantly, indicating a more uniform tone  
32 of color under higher Red:Blue ratios; iii) the Saturation in the side-view images increased, which  
33 could be the sign of denser pigmentation under higher Red:Blue. This increased pigmentation  
34 would then be due to other pigments than chlorophyll since leaf chlorophyll measured with the  
35 transmission probe followed an opposite trend (Figure 6).

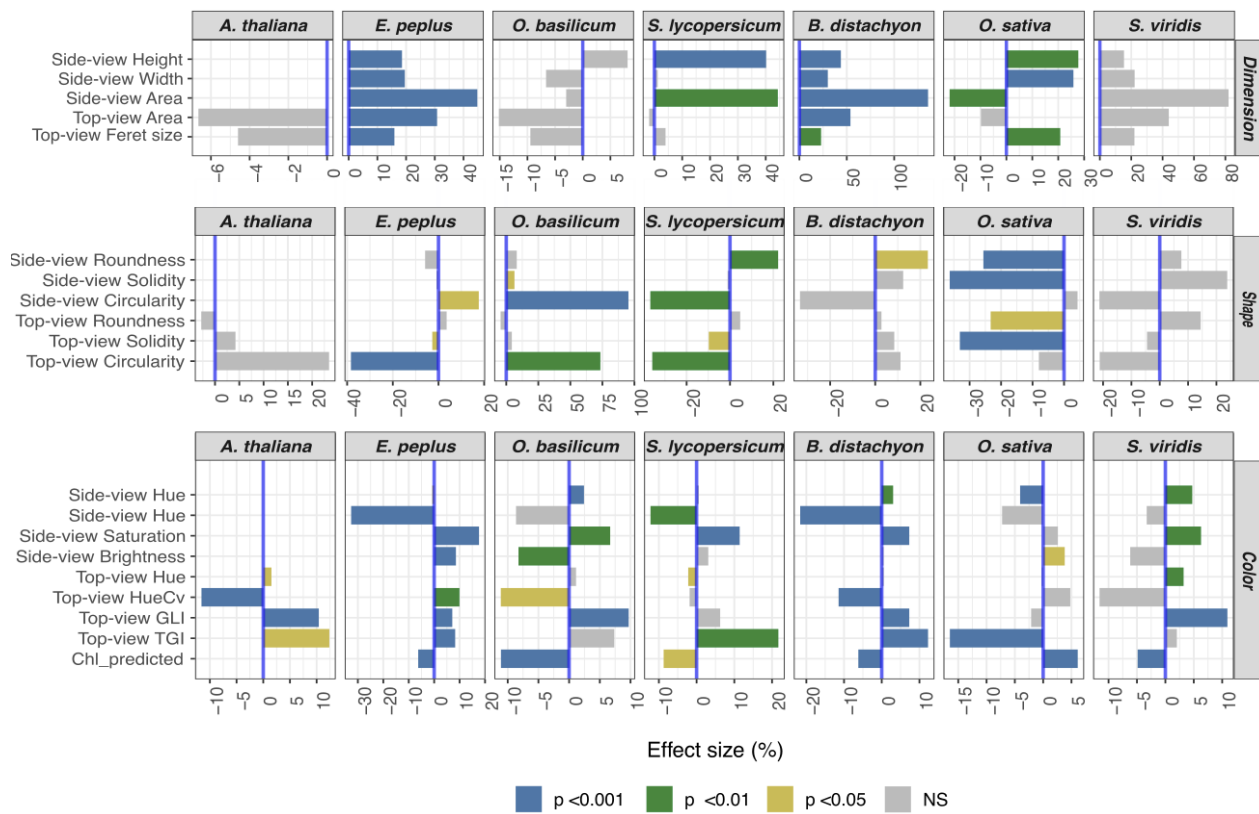

1  
2  
3  
4  
5  
6

**Figure 7.** Red:Blue gradient effect size (%) measured 29 days after the start of the gradient. Effect size was computed as explained in Materials and Methods. Only 20 parameters are shown, for which a highly significant correlation ( $p < 0.01$ ) with Red:Blue ratio was found in at least one species. The significance categories are based on the p-value of the computed  $R^2$ .



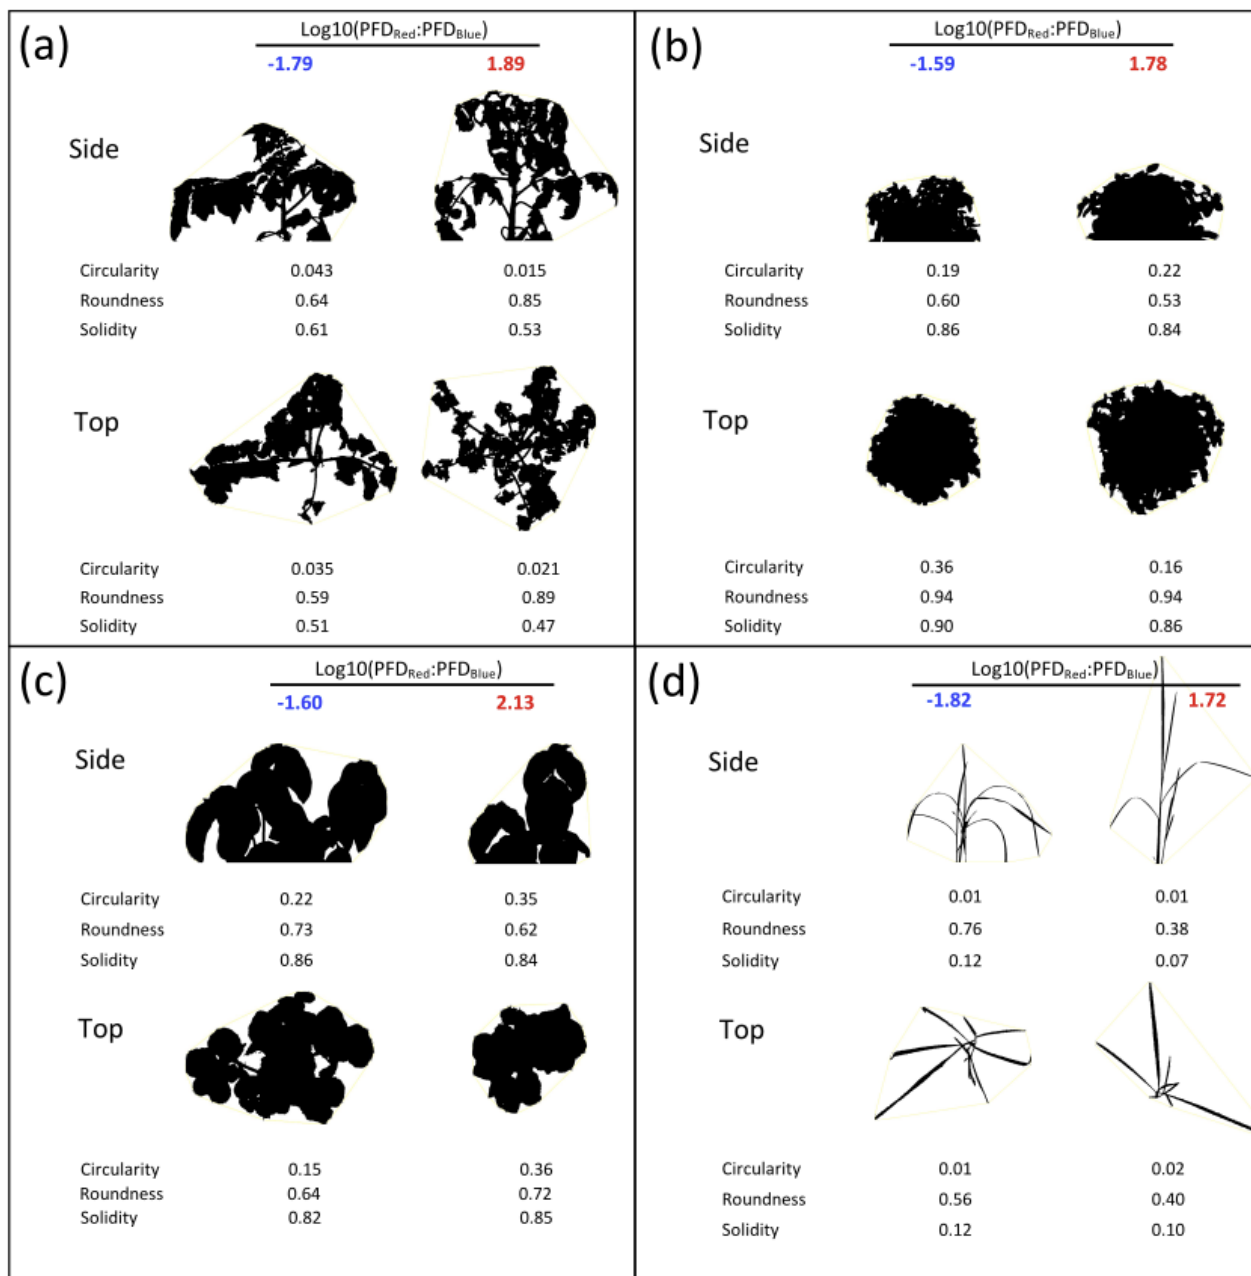

**Figure 8.** Individual plant silhouettes illustrating the effects of the Red:Blue gradient on plant shape factors in four species: (a) *S. lycopersicum*, (b) *E. pepplus*, (c) *O. basilicum*, (d) *O. sativa*.

Finally, we plotted the evolution of the slopes of the linear regressions that were calculated between phenotypic traits and the Red:Blue ratio at different time points during and after the gradient treatment (Figure 9). The purpose is to visualize how the effects of the Red:Blue gradient evolved in the time course of the experiment and whether they were maintained or not after returning the plants to white light.

Figure 9 shows that the effects of the Red:Blue gradient on plant dimension descriptors (side-view Height, Area, and top-view Area) were measurable soon after start of the treatment and increased for its duration. For example, the side-view Height increased more and more with the Red:Blue ratio and with the time spent under the gradient. This phenotypic change was reversible under white light in *B. distachyon*, *E. pepplus*, *O. basilicum*, and *O. sativa*, indicating that the differences in height were due, at least partly, to changes in plant stature, i.e. changes in shoot and

1 leaves inclination. In *B. distachyon* and *E. peplus*, the side and top Area increased with the same  
2 trends than side-view Height, indicating a reversible opening of the plant bush under higher  
3 Red:Blue ratios. The opposite was observed in *O. sativa*, with the slope of the correlation for side  
4 and top Areas decreasing gradually during the gradient treatment and even after retransfer to white  
5 light. This behavior can be explained by a more erect position of the leaves under higher Red:Blue  
6 ratios, which is consistent with the observation that rice was the only species with decreased  
7 Roundness (more elongated shape) at high Red:Blue ratio (see Figures 7 and 8).

8 In *S. lycopersicum* and *S. viridis*, the increases in side-view Height, side-view Area, and  
9 top-view Area with the Red:Blue ratio were maintained after the treatment, reflecting irreversible  
10 changes in plant growth with light quality. Internode elongation was indeed observed in both  
11 species.

12 Shape and color factors showed abrupt variations after the start of the Red:Blue treatment  
13 in all species. In some cases, the synchrony of the changes clearly suggested a correlation between  
14 traits. For example in *S. lycopersicum*, changes in top-view Circularity and top-view TGI appeared  
15 almost perfectly synchronized, indicating a high correlation - in this case, negative - between these  
16 parameters. This observation suggests that plant shapes may influence color indices through a  
17 change of reflectance. However, color indices such as TGI may still be indicative of pigment  
18 composition as we observed an inverse correlation with chlorophyll content in 5 out of 7 species  
19 (see Figure S3), with only *O. sativa* and *S. viridis* showing slightly positive or no correlation,  
20 respectively.

21

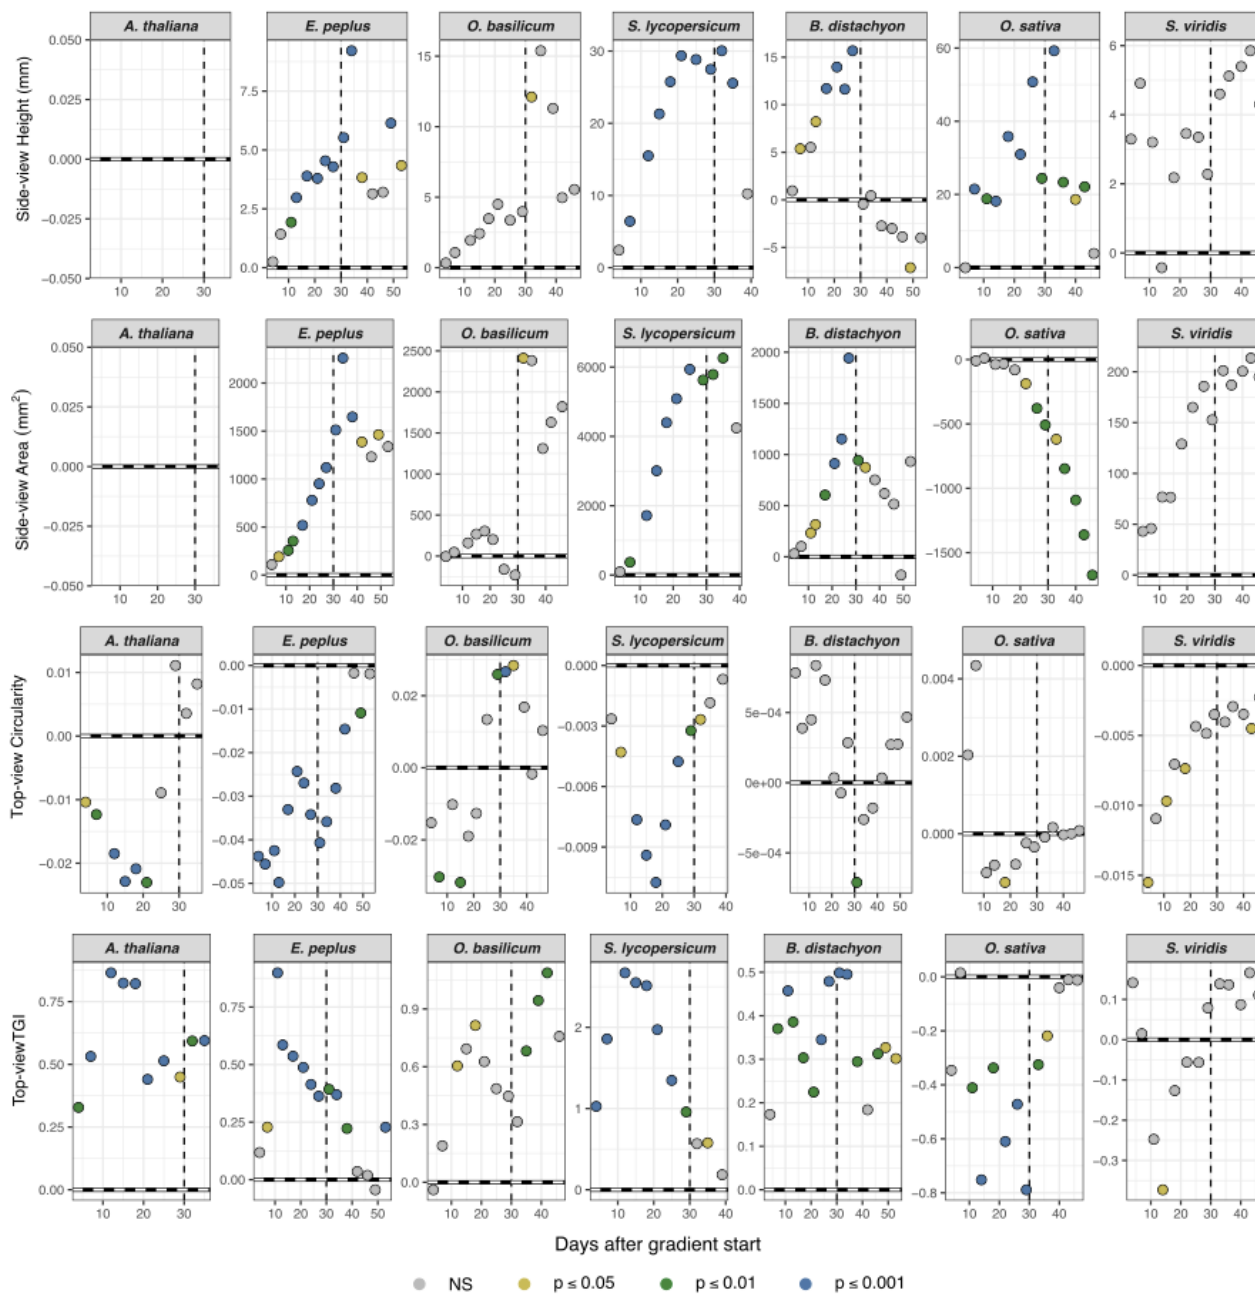

**Figure 9.** Evolution with time of the phenotypic response to the Red:Blue gradient. Values shown are the slopes of the regressions between phenotypic traits and the Red:Blue ratio, calculated at each time point. Horizontal solid line: slope = 0 (no effect of the gradient). Vertical dotted line: end of the Red:Blue gradient treatment, return to white light. The significance categories are based on the p-value of the computed  $R^2$ .

#### 4. Discussion

The combination of new LED technologies with high-throughput phenotyping pipelines provides unprecedented perspectives for research and agricultural applications. The purpose of our research was to explore the capabilities and possible applications of combining smart LED devices with image-based phenotyping for the characterization of model plants and crops. Therefore, we selected seven species for simultaneous experimentation. While most studies focus on monochromatic LEDs, our approach showed that growing plants under a color gradient provides

1 reliable data with additional insights, in the form of correlative trends, which are key to control  
2 plant responses and eventually ameliorate desired characters. Indeed, spectrally variable LED  
3 lighting sources allow flexible set up, including the use of distinct light recipes that can be tested  
4 simultaneously within the same cabinet, with light quality as the only explanatory variable to the  
5 observed phenotypes.

6 To evaluate the impact of a Red:Blue light gradient across time, we acquired several images  
7 for each individual plant at regular intervals. These images were analyzed using an automated  
8 analysis software that retrieved multiple measurements, including plant dimensions, shape factors,  
9 and color indices. These measurements or phenotypic descriptors, are different from those obtained  
10 using ruler-based visual methods. Although they are not always easy to apprehend, they have the  
11 key advantage to be highly precise, thus allowing the detection of subtle changes that would not be  
12 noticeable by an operator, such as shifts in shape or color that are not visually obvious. In order to  
13 make sense of the very large dataset that we generated, we used a correlative approach and  
14 calculated linear regressions between many dependent variables —the phenotypic descriptors—  
15 and one explanatory variable —the Red:Blue ratio. The resulting regression coefficients allowed  
16 us to grasp the response profiles of the different species exposed to the color gradient.

#### 17 4.1. General effects of the light gradient

18 A key question of this study was whether we would identify common trends within the  
19 response of different species to the light gradient. To investigate this question, we quantified three  
20 categories of phenotypic descriptors in the selected seven plant species: dimension and shape  
21 indices are relevant to quantify variations in the plant stature, while color indices indicate possible  
22 variations in plant pigments. It is important to note that, although color indices (e.g. TGI) can help  
23 detect differences that are not visually obvious, they can be ambiguous and do not always accurately  
24 reflect actual changes in pigment contents, so that further species-specific calibrations are required  
25 before any practical application. The time-course analysis of dimension, shape, and color indices  
26 during and after the light treatment revealed that some effects of the gradient were reversible, either  
27 within days or more slowly, while others were irreversible. We found responses to the light gradient  
28 for most species, but the amplitude and direction of these changes were remarkably species-  
29 dependent (Figure 10). Consequently, general phenotypes cannot be predicted without  
30 experimental work, highlighting the need to analyze each species separately.

#### 31 4.2. Species-specific behaviors

32 In *A. thaliana*, we did not observe any effect of the light gradient on the size of the rosette.  
33 However, we detected that higher Red:Blue ratios caused an increase in the top-view Circularity  
34 parameter. This change is likely caused by an increase in leaf curling, a known red light-induced  
35 phenotypic response. Indeed, Inoue et al. reported that, upon exposure to red light, newly initiated  
36 leaves were curled and slanted downward, a phenotype that could be reversed by the addition of  
37 blue light (14). A similar phenotype, known as the “red-light syndrome”, has been reported in other  
38 species, including crops (29, 48).

39 *E. pepplus* is an annual medicinal eudicot whose sap, which is toxic to rapidly replicating  
40 human tissue, has long been used as a traditional remedy for common skin lesions and, more  
41 recently, for pre-cancerous pathologies. To the best of our knowledge, this is the first study  
42 involving the indoor cultivation of this species and our observations suggest a potential mean to  
43 optimize its biomass production. Indeed, *E. pepplus* was the species that responded the most  
44 homogeneously in terms of plant dimensions, as all size-related descriptors were increased under  
45 higher Red:Blue ratios. This phenotype was the consequence of an increased growth of the bush in  
46 all directions. Stem elongation loosened the compact foliage, thus decreasing side-view Circularity  
47 under higher Red:Blue ratios.



1  
2  
3  
4  
5  
6  
7  
8  
9  
10  
11  
12  
13  
14  
15  
16  
17  
18  
19  
20  
21  
22  
23  
24  
25  
26  
27  
28  
29  
30  
31  
32  
33  
34  
35  
36  
37  
38  
39  
40  
41  
42  
43  
44  
45  
46  
47

In *O. basilicum*, we did not identify any significant effect of the light gradient on size descriptors, but we did observe an increase in the Circularity shape factor, which suggested a compaction of the bush under higher Red:Blue ratios. Previous reports, in which the response of *O. basilicum* to environmental factors was assessed using biomass measurements, showed conflicting results: blue light was reported to either improve (49, 50) or to reduce shoot biomass by limiting stem elongation and leaf expansion (51), depending on the growing setup. Our results, however, show that the shape of *O. basilicum* bush can be manipulated by light, which can be a valuable tool to meet market specifications.

In *S. lycopersicum*, we observed a strong increase in shoot height under higher Red:Blue ratios. This phenotype, which is a consequence of higher internode elongation, is consistent with previous studies showing that blue wavelengths inhibit stem elongation in phylogenetically distant eudicot species such as lettuce, soybean, and tomato (52–54). We also found differences in color proxies (TGI, chlorophyll measurements) along the color gradient, which are consistent with a previous report showing that blue light exposure increases chlorophyll content in tomato leaves (54).

Among the three monocots that we studied, *B. distachyon*, a species increasingly used as a model plant to study developmental processes in Pooids, is the organism whose dimensions were the most affected by the light gradient. We observed an increase in height and diameter upon increasing Red:Blue ratio. One possible explanation would be a reduction of leaf length by blue light, as already reported for wheat (55). Another possible explanation would be a stimulation of tillering upon red light exposure, but closer observations are required to test that hypothesis.

Interestingly, in *O. sativa*, we observed that increased Red:Blue ratios alter the plant shape by enhancing the erectness of leaves and causing plant tightening, as reflected by changes in the Roundness and Solidity phenotypic descriptors. These modifications of the plant stature could explain that the color indices based on leaf reflectance (e.g. TGI) were not good proxies of chlorophyll content in this species. Interestingly, erect leaves were previously shown to improve photosynthesis and yield in rice by reducing leaf shading in dense plantations (56). This phenotype is regulated by environmental and hormonal factors, among which brassinosteroids exert a prominent role. The effects of light quality observed here could act upstream of these hormones, as suggested in earlier reports (57).

In *S. viridis*, a Poaceae used as a model to study C4 photosynthesis, we observed unexpected effects of the light gradient on the chlorophyll content. Indeed, whereas the chlorophyll content decreased with higher Red:Blue ratios in all other species, it increased in *S. viridis*, but remained lower than under white light, again in opposition to other species. It is tempting to speculate that this peculiar behavior of *S. viridis* is linked to its C4 metabolism, but there are actually not many other reports that we are aware of to confirm this idea. In one report, though, it was shown that, in maize, blue light represses the accumulation of chlorophylls, compared to red light (58), which seems consistent with our observations. On a different level, it is noteworthy that this effect on chlorophyll in *S. viridis* was not revealed by color indices such as TGI, illustrating the limitations of non-destructive color proxies. One explanation is that, unlike in the other species, *S. viridis* plants started flowering during the gradient treatment, and TGI may have been biased by the presence of paler green panicles, independently of the variations in leaf chlorophyll content.

In conclusion, the effects of the Red:Blue gradient are strongly species-dependent and do not allow generalization. It would be interesting, however, to broaden the analysis to more plant species to test whether functional groups showing similar behavior can be identified.

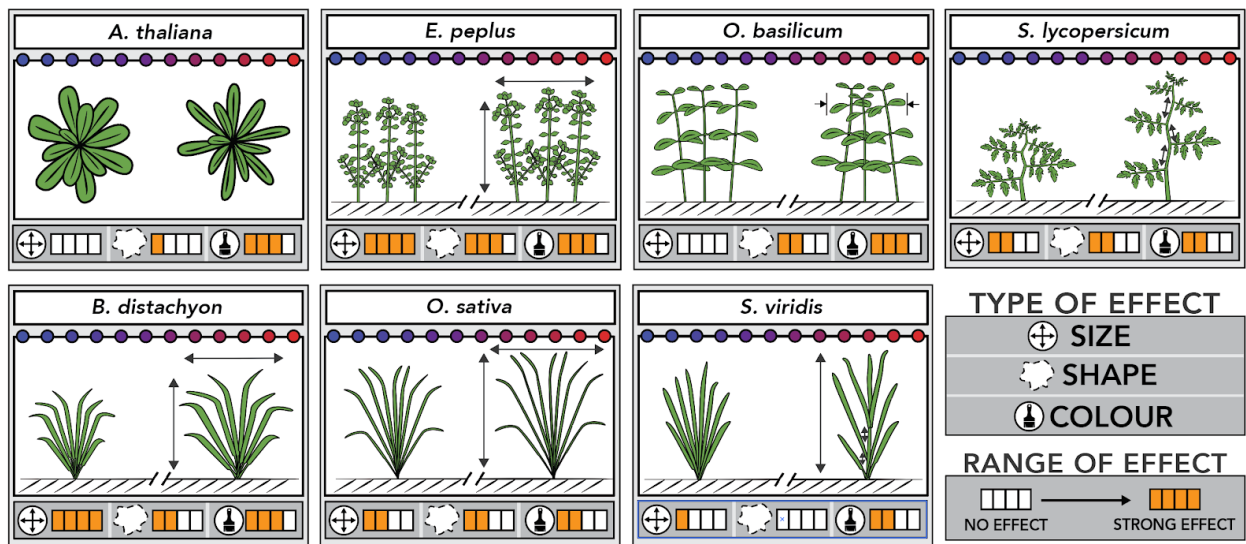

1  
2 **Figure 10.** Schematic representation of the phenotypic variations caused by a Red:Blue  
3 light gradient in seven plant species. Effects observed 29 days after the start of the light gradient.  
4

#### 5 4.3 Future Improvements and Perspectives

6 The pipeline presented here proved to be effective to screen the effects of a light gradient  
7 on the phenotype of multiple plant species. Some technical components could, however, be  
8 improved. For example, our low-cost in-house imaging station requires the manual transport of  
9 plants, and hence an automated conveyor system would reduce operating time by an estimated two  
10 fold at least. Alternatively, an in-chamber top view imaging device could be used although with its  
11 own caveats, additional analysis challenges, and limitations. In particular, it is not well suited to  
12 phenotyping individual plants within a canopy, which is a major statistical drawback.

13 In order to validate our pipeline, we have chosen a simple light mixture of red and blue  
14 lights, which has been the focus of many publications in the horticultural domain. However, many  
15 types of gradients can be tested, including linear gradients involving other wavelengths (Red:Far-  
16 Red, Red/Blue:Green, UV-A:UV-B) and bi-dimensional gradients, which would help explore a  
17 larger number of conditions in a single experiment. The gradient approach could also be used to  
18 determine the optimum of light mixture required for a given trait, or to acquire the data necessary  
19 for modeling plant responses to the light quality.

20 Image analysis was performed using the popular, and free to use, generalist package,  
21 ImageJ. The same measurements could also be accomplished with many other available softwares,  
22 some of which offer more specialized functionalities for plant phenotyping (see  
23 <https://www.quantitative-plant.org/software> for an overview of available plant phenotyping  
24 applications). Nevertheless, our process turned out to provide exploitable proxies for plant  
25 dimension and shape, although color indices were not always correlated with differences in  
26 chlorophyll contents. Indeed, the color indices may be, at least partially, sensitive to differences in  
27 the reflectance caused by distinct plant shapes and leaf orientations. Similar issues were previously  
28 reported in studies on spectral imaging and the solution requires capturing leaf orientations and  
29 subsequently modeling light reflectance (59).

30 The accuracy, relevance, and depth of phenotyping could be improved by using new  
31 imaging technologies such as spectral, tridimensional, thermal, or fluorescence imaging, depending  
32 on the desired application. Additional calibration steps based on conventional biometric  
33 measurements of plant biomass remain highly recommended to ascertain the significance of

1 imaging-based phenotypic descriptors. Another attractive approach is to use machine learning to  
2 facilitate the interpretation of the complex set of parameters generated by imaging, especially when  
3 it comes to phenotypic descriptors such as shape factors and color indices which are more difficult  
4 to grasp. For example, classification techniques would allow to categorize plants according to pre-  
5 defined criteria, and provide the user with a more holistic understanding of the plant phenotype.

#### 6 4.4 Conclusions

7 To conclude, the setup described here can be improved and upscaled in many of its aspects  
8 to meet a variety of research needs. Still, the unique combination of light gradients with in-depth  
9 phenotyping obviously provides new perspectives to address fundamental plant biology questions  
10 as well as help improve applications in screening, breeding, modeling, or functional genomics. In  
11 particular, this approach provides innovative tools for the development of new varieties that are  
12 better suited for indoor light conditions.

#### 13 **Acknowledgments**

##### 14 **General:**

15  
16  
17 Early access to the Lumiatec LED lighting systems was possible with the collaboration of  
18 GDTech and Araponics R&D teams, especially George Ferdinand, Michaël Menu, Julien Reuland,  
19 and Dylan Dohogne. The authors are also grateful to Sébastien Steyaert and Gabriel Berger, for  
20 their technical assistance for plant cultivation and imaging, and to Profs Frédéric Lebeau, and  
21 Guillaume Lobet for fruitful discussions and comments on the manuscript.

##### 22 **Author contributions:**

23  
24 PL, AF, FB, SHF, PT, and CP designed the experiment and wrote the paper. AF and PT set-  
25 up the Lumiatec luminaries. PL created the imaging cabinet; AF and PT developed the image  
26 acquisition software and interface. PL designed the image analysis script and processed the raw  
27 data.

##### 28 **Funding:**

29  
30 This research was supported by the European Union and the Walloon Region of Belgium,  
31 via the European Funds for Regional Development 2014-2020 / En Mieux (Tropical Plant Factory  
32 portfolio, Project C Plant'HP) and the Competitiveness cluster Wagralim (Project VeLiRe).  
33 Frédéric Bouché is an FNRS post-doc fellow (FC87200) and Samuel Huerga Fernández has an  
34 FNRS-FRIA grant (FC21283).

##### 35 **Competing interests:**

36  
37 The authors declare that there is no conflict of interest regarding the publication of this article.

##### 38 **Data Availability:**

39  
40 Data, including measurements database, image analysis script, R script, and link to raw  
41 images, are available at zenodo.org (<https://doi.org/10.5281/zenodo.4071811>).

1  
2  
3  
4

## Supplementary Materials

Table S1. Steps in the image processing to generate plant morphology and color measurements.

| Nr                     | Description                                                                               | Comment                                                                                                                                                                           |
|------------------------|-------------------------------------------------------------------------------------------|-----------------------------------------------------------------------------------------------------------------------------------------------------------------------------------|
| <b>Steps in ImageJ</b> |                                                                                           |                                                                                                                                                                                   |
| 1                      | Read image file, get plant name, camera view, and frame number                            | "_0_" = side view "_1_" = top view                                                                                                                                                |
| 2                      | Find blue square in the color target and extract x,y coordinates                          | To convert to HSB color model, threshold light blue objects and record x,y coordinates                                                                                            |
| 3                      | White balance using grey values on the reference target card                              | Adapted from P. Mascalchi ( <a href="https://github.com/pmascalchi/ImageJ_Auto-white-balance-correction">https://github.com/pmascalchi/ImageJ_Auto-white-balance-correction</a> ) |
| 4                      | Set the ROI (region of interest)                                                          | To remove borders and reference card                                                                                                                                              |
| 5                      | Create a HSB (hue, saturation, intensity) image                                           | The HSB image is used later for color measurements                                                                                                                                |
| 6                      | Separate RGB channels into 3 grey-level images                                            | For both thresholding and computing greenness indices                                                                                                                             |
| 7                      | Side-view images only:<br>Threshold on the B (blue) channel                               | To segment the plant from the background before measurements                                                                                                                      |
| 8                      | Top-view images only:<br>Color threshold in HSB (hue, saturation, brightness) color space | Color thresholding is much slower than single channel thresholding, but is necessary when the background is not uniform as is the case with top view images                       |
| 9                      | Eliminate small noise blobs based on size threshold                                       | To eliminate any small background artifacts                                                                                                                                       |

|    |                                                                         |                                                                                                                                                                                           |
|----|-------------------------------------------------------------------------|-------------------------------------------------------------------------------------------------------------------------------------------------------------------------------------------|
| 10 | Erode irregularities around the segmented object shape                  | To increase precision of contour measurements                                                                                                                                             |
| 11 | Create a selection for morphological measurements                       | This is a binary “mask” of the plant                                                                                                                                                      |
| 12 | Save cropped color image for visual check                               | For rapid post-processing visual checks the smallest region enclosing the plant is saved as a separate color image                                                                        |
| 13 | Measure plant dimensions on the segmented shape                         | “Basic” morphology parameters including : area, perimeter, height, width, major and minor axis lengths and angles, bounding box, centroid, solidity, circularity, aspect ratio, roundness |
| 14 | Compute convex hull area and perimeter                                  | Useful for computing convexity indices                                                                                                                                                    |
| 15 | Save hull image                                                         | For rapid post-processing visual checks if needed                                                                                                                                         |
| 16 | Redo a more stringent threshold to remove mixed background/plant pixels | The 2-3 pixels in the perimeter of the shape are a mix of background and plant color, and therefore need to be removed before measuring plant color parameters                            |
| 17 | Erode the borders of the plant to eliminate the edge pixels             | To further remove mixed color pixels                                                                                                                                                      |
| 18 | Create a reduced mask based on the stringent threshold                  | To be applied on the RGB and HSB separated channels                                                                                                                                       |
| 19 | Measure Red, Green, and Blue, densities on the reduced mask             | The reduced mask is applied on each of the previously splitted R, G, and B channels. Measurements include mean density, stdev, mode, min, and max values                                  |
| 20 | Measure Hue, Saturation, and Brightness densities on the reduced mask   | The reduced mask is applied on each of the hue, saturation, and brightness channels. Measurements include mean density, stdev, mode, min, max, skewness, and kurtosis values              |
| 21 | Export data to text file                                                | All morphology and color measurements are saved in a csv file for further statistical analysis                                                                                            |



| <b>Steps in Rstudio</b> |                                                                                                |                                                                                                                                                                                                                                                             |
|-------------------------|------------------------------------------------------------------------------------------------|-------------------------------------------------------------------------------------------------------------------------------------------------------------------------------------------------------------------------------------------------------------|
| 22                      | Extract metadata from the filenames                                                            | Get Plant id, camera id, date:time in separate fields                                                                                                                                                                                                       |
| 23                      | Merge image and plant data                                                                     | Get Species, Room, and Location of each plant from a separate plant file                                                                                                                                                                                    |
| 24                      | Compute days after sowing (DAS) and days under gradient conditions for each imaging time point |                                                                                                                                                                                                                                                             |
| 25                      | Perform visual quality check by plotting dimensions and color indices                          | For each species and time point, plotting Height vs Width indicates if there are clear abnormal measurements due to e.g. objects in the background.                                                                                                         |
| 26                      | Flag clear outliers                                                                            | Outliers are flagged based on step 25 and on color measurements of the background reference card                                                                                                                                                            |
| 27                      | Aggregate image data per plant                                                                 | The measurements from the 6 side-view images are aggregated into one value per plant. For ex. Side area is the average of 6 images, side height and width are the maximum values.<br>Top- and side-view measurements are aggregated per plant and timepoint |
| 28                      | Compute additional derived measurements                                                        | Voxel, Verticality, Green Leaf Index, Triangular Greenness Index, Chlorophyll content prediction are calculated                                                                                                                                             |
| 29                      | Merge imaging data and light mapping data                                                      | The local light data (intensity, spectra, computed Red:Blue ratio and phytochrome photostationary state (PSS)) is merged with plant imaging data                                                                                                            |
| 30                      | Merge imaging data and manual measurement data                                                 | E.g. leaf chlorophyll content recorded with Apogee probe                                                                                                                                                                                                    |

1  
2  
3  
4

Table S2. Summary list of the plant dimension, shape, and color parameters measured by imaging, including definition, calculation, and units.

| <b>Label</b> | <b>Definition</b> | <b>Formula</b> | <b>Unit or scale</b> |
|--------------|-------------------|----------------|----------------------|
|--------------|-------------------|----------------|----------------------|

| <b>Dimensions</b><br>(note: For side-view parameters, the mean of the 6 images was used except for Height and Width where the max was considered more relevant) |                                                                                                                                  |                                                                                                 |                 |
|-----------------------------------------------------------------------------------------------------------------------------------------------------------------|----------------------------------------------------------------------------------------------------------------------------------|-------------------------------------------------------------------------------------------------|-----------------|
| HeightMax                                                                                                                                                       | Maximum height of the plant out of 6 side-view images during 180° rotation                                                       |                                                                                                 | mm              |
| WidthMax                                                                                                                                                        | Maximum width of the plant out of 6 side-view images during 180° rotation                                                        |                                                                                                 | mm              |
| AreaMean                                                                                                                                                        | Mean Projected Area out of 6 side-view images during 180° rotation                                                               |                                                                                                 | mm <sup>2</sup> |
| Area                                                                                                                                                            | Projected Area out of 1 top view image                                                                                           |                                                                                                 | mm <sup>2</sup> |
| MeanFeret                                                                                                                                                       | Average of maximum and minimum distances between 2 points along the selection boundary.                                          |                                                                                                 | mm              |
| Voxel                                                                                                                                                           | Plant volume estimate combining side- and top-view area of the plant                                                             | $\text{sqrt}(\max(\text{side-view area}) * \min(\text{side-view area}) * \text{top-view area})$ | mm <sup>3</sup> |
| <b>Shape factors</b><br>(note: For side-view parameters, the mean of the 6 images was used)                                                                     |                                                                                                                                  |                                                                                                 |                 |
| Roundness                                                                                                                                                       | Degree of similarity to a circle derived from the fitted ellipse axes                                                            | minor axis / major axis (of the fitted ellipse)                                                 | Scale 0 to 1    |
| Solidity                                                                                                                                                        | Overall concavity derived from area and convex-hull measurements                                                                 | area / convex-hull area                                                                         | Scale 0 to 1    |
| Convexity                                                                                                                                                       | Edge "roughness" derived from convex hull and perimeter measurements                                                             | convex-hull perimeter / perimeter                                                               | Scale 0 to 1    |
| Circularity                                                                                                                                                     | Ratio of the area of the shape to the area of a circle having the same perimeter (a.k.a "isoperimetric quotient")                | $4\pi * \text{area} / \text{perimeter}^2$                                                       | Scale 0 to 1    |
| Compactness                                                                                                                                                     | Degree of compactness derived from the ratio of the diameter a circle with the same area to the major axis of the fitted ellipse | $\text{sqrt}((4/\pi) * \text{area}) / \text{major ellipse axis}$                                | Scale 0 to 1    |
| <b>Color indices</b><br>(note: For side-view parameters, the mean of the 6 images was used)                                                                     |                                                                                                                                  |                                                                                                 |                 |

|                |                                                                                                                                                                   |                                                                                                     |                              |
|----------------|-------------------------------------------------------------------------------------------------------------------------------------------------------------------|-----------------------------------------------------------------------------------------------------|------------------------------|
| HueMean        | Average hue component of the plant's color after transformation of the RGB image into HSB model (Hue Saturation Brightness)                                       |                                                                                                     | Scale 0 to 255               |
| HueCv          | Coefficient of variation of the plant's pixels hue                                                                                                                | $\text{stdev}(\text{hue}) / \text{avg}(\text{hue})$                                                 | %                            |
| SaturationMean | Average saturation component of the plant's color after transformation of the RGB image into HSB model (Hue Saturation Brightness)                                |                                                                                                     | Scale 0 to 255               |
| BrightnessMean | Average brightness component of the plant's color after transformation of the RGB image into HSB model (Hue Saturation Brightness)                                |                                                                                                     | Scale 0 to 255               |
| RedMean        | Average red component of the plant's color in the RGB model                                                                                                       |                                                                                                     | Scale 0 to 255               |
| GreenMean      | Average green component of the plant's color in the RGB model                                                                                                     |                                                                                                     | Scale 0 to 255               |
| BlueMean       | Average blue component of the plant's color in the RGB model                                                                                                      |                                                                                                     | Scale 0 to 255               |
| Density        | Integrated density: The sum of the grey values of the pixels in the image or selection                                                                            | $\text{area} * \text{mean grey value}$                                                              |                              |
| GLI            | Green Leaf Index : vegetation index for use with a digital RGB camera                                                                                             | $(2 * \text{Green} - \text{Red} - \text{Blue}) / (2 * \text{Green} + \text{Red} + \text{Blue})$     |                              |
| TGI            | Triangular Greenness Index : approximate area of a triangle bounding a leaf reflectance spectrum, where the vertices are in the red, green, and blue wavelengths. | $((670 - 480) * (\text{tRed} - \text{tGreen}) - (670 - 550) * (\text{tRed} - \text{tBlue})) / -200$ |                              |
| Chl_predicted  | Predicted leaf chlorophyll content derived from multiple linear regression using Red Green and Blue components of the plant color in the RGB model                | $440 + \text{blue} * 7.266 + \text{red} * 10.873 + \text{green} * -15.545$                          | $\mu\text{moles}/\text{m}^2$ |

1

### Main features:

- Smallest detail size: 0.5mm
- Rotation: max 45°/sec
- Throughput: max 10 sec/plant

### Side-view:

- Working distance = 200-300 cm
- Field of view at 350 cm = 200x150 cm
- Max plant height: 150cm
- Min plant height: 3cm

### Top-view:

- Working distance: 130-280 cm
- Field of View at 350cm = 150x150cm

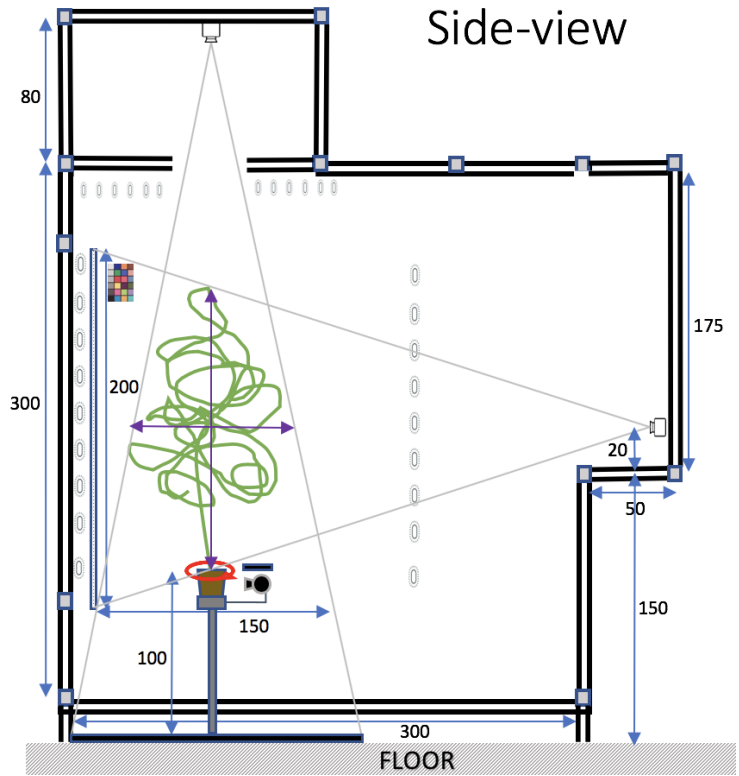

2

3

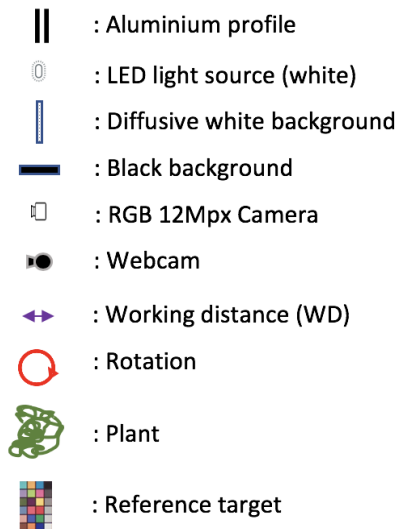

4

5

6

### Top-view

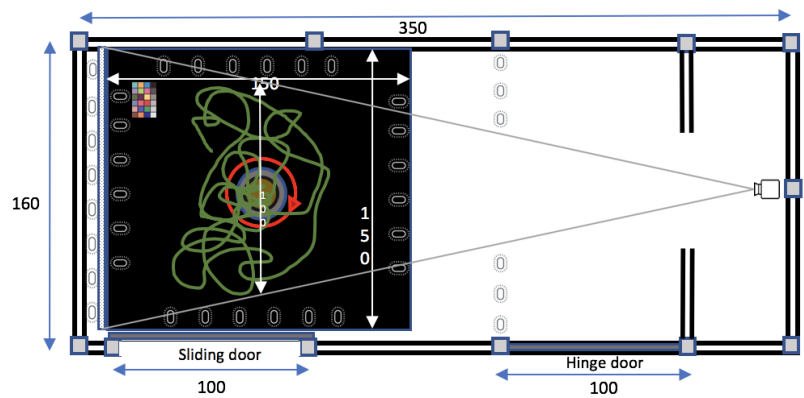

**Figure S1.** Schematic representation of the imaging setup.

1

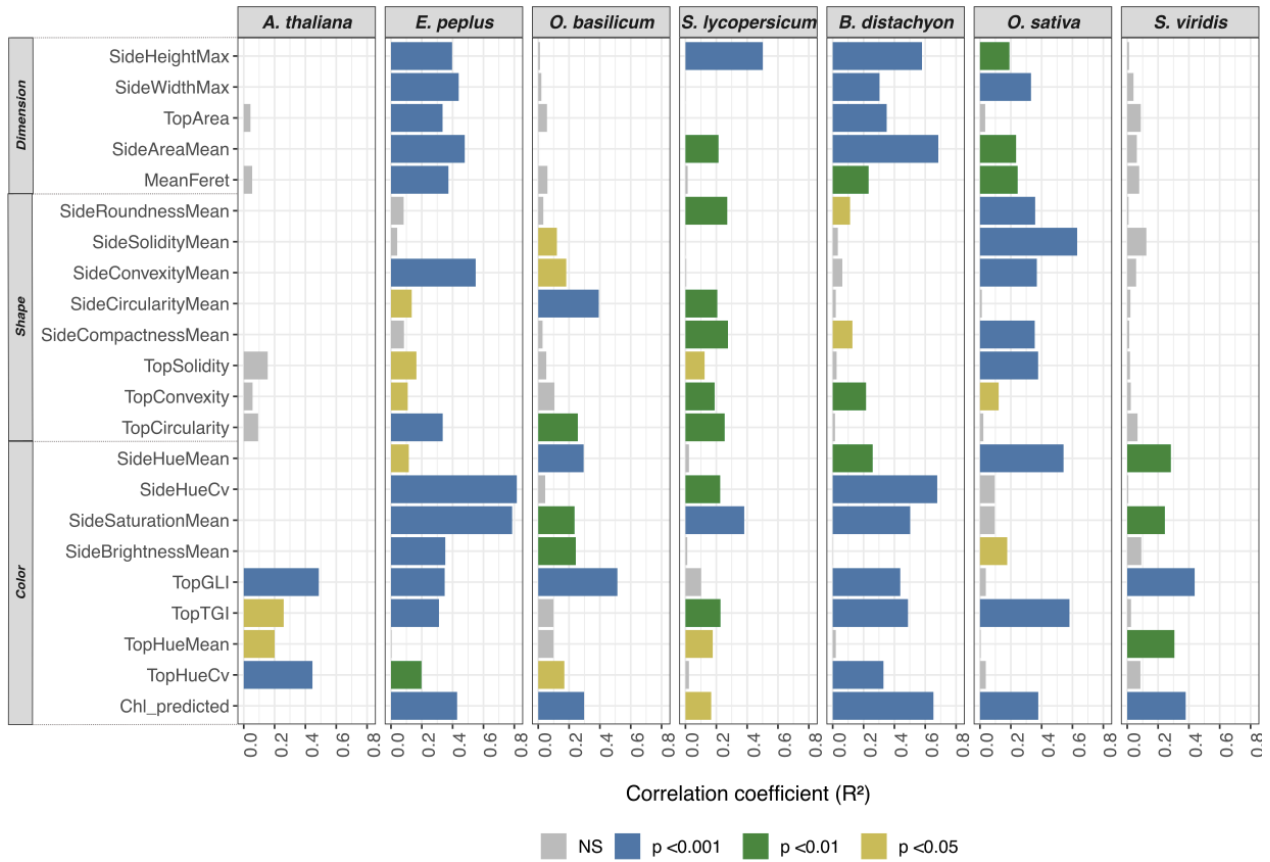

2  
3  
4  
5  
6  
7

**Figure S2.** Correlation coefficients ( $R^2$ ) of the linear regressions between various phenotypic traits measured at day 29 after the start of the gradient treatment and the Red:Blue ratio, as shown in Figure 6.

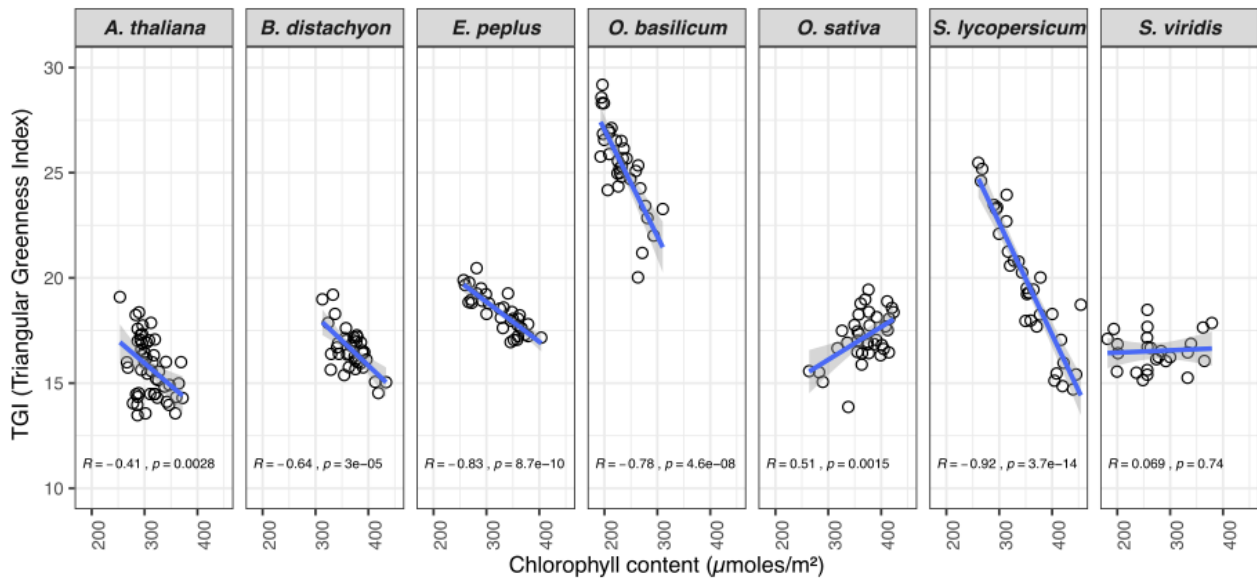

**Figure S3.** Correlation between leaf chlorophyll content, as measured manually with an Apogee MC-100 chlorophyll meter, and the Triangular Greenness Index (TGI) computed from RGB images.

8  
9  
10  
11  
12



1  
2  
3 **References**  
4

- 5 1. R. J. Oakenfull, S. J. Davis, Shining a light on the Arabidopsis circadian clock. *Plant Cell*  
6 *Environ.* 40, 2571–2585 (2017).
- 7 2. J. A. Endler, The Color of Light in Forests and Its Implications. *Ecol. Monogr.* 63, 1–27  
8 (1993).
- 9 3. D. W. Lee, K. R. Downum, The spectral distribution of biologically active solar radiation  
10 at Miami, Florida, USA. *Int. J. Biometeorol.* 35, 48–54 (1991).
- 11 4. R. L. Lee, J. Hernández-Andrés, Colors of the daytime overcast sky. *Appl. Opt.* 44, 5712  
12 (2005).
- 13 5. S.-G. Kong, K. Okajima, Diverse photoreceptors and light responses in plants. *J. Plant Res.*  
14 129, 111–114 (2016).
- 15 6. I. Paik, E. Huq, Plant photoreceptors: Multi-functional sensory proteins and their signaling  
16 networks. *Semin. Cell Dev. Biol.* 92, 114–121 (2019).
- 17 7. Y. Oka, K. Yamamoto, Photoreceptor-Mediated Plant Development. In: *Plant Factory*  
18 *Using Artificial Light*, A. Masakazu, F. Hirokazu, W. Teruo, Eds, Elsevier Inc., 111–117  
19 (2019).
- 20 8. K. van Gelderen, C. Kang, R. Paalman, D. Keuskamp, S. Hayes, R. Pierik, Far-Red Light  
21 Detection in the Shoot Regulates Lateral Root Development through the HY5 Transcription  
22 Factor. *Plant Cell* 30, 101–116 (2018).
- 23 9. K. Lau, R. Podolec, R. Chappuis, R. Ulm, M. Hothorn, Plant photoreceptors and their  
24 signaling components compete for COP 1 binding via VP peptide motifs. *EMBO J.* 38  
25 e102140 (2019).
- 26 10. D. P. Fraser, S. Hayes, K. A. Franklin, Photoreceptor crosstalk in shade avoidance. *Curr.*  
27 *Opin. Plant Biol.* 33, 1–7 (2016).
- 28 11. Y. Luo, H. Shi, Direct Regulation of Phytohormone Actions by Photoreceptors. *Trends*  
29 *Plant Sci.* 24, 105–108 (2019).
- 30 12. A.-S. Fiorucci, C. Fankhauser, Plant Strategies for Enhancing Access to Sunlight. *Curr.*  
31 *Biol.* 27, R931–R940 (2017).
- 32 13. T. Kozuka, N. Suetsugu, M. Wada, A. Nagatani, Antagonistic Regulation of Leaf Flattening  
33 by Phytochrome B and Phototropin in *Arabidopsis thaliana*. *Plant Cell Physiol.* 54, 69–79  
34 (2013).
- 35 14. S. Inoue, T. Kinoshita, A. Takemiya, M. Doi, K. Shimazaki, Leaf Positioning of  
36 *Arabidopsis* in Response to Blue Light. *Mol. Plant.* 1, 15–26 (2008).
- 37 15. D. Yang, D. D. Seaton, J. Krahmer, K. J. Halliday, Photoreceptor effects on plant biomass,  
38 resource allocation, and metabolic state. *Proc. Natl. Acad. Sci.* 113, 7667–7672 (2016).
- 39 16. A. Takemiya, S. Inoue, M. Doi, T. Kinoshita, K. Shimazaki, Phototropins Promote Plant  
40 Growth in Response to Blue Light in Low Light Environments. *Plant Cell.* 17, 1120–1127  
41 (2005).
- 42 17. P. F. Devlin, Plants wait for the lights to change to red. *Proc. Natl. Acad. Sci.* 113, 7301–  
43 7303 (2016).

- 1 18. N. Lu, C. A. Mitchell, Supplemental Lighting for Greenhouse-Grown Fruiting Vegetables.  
2 In LED Lighting for Urban Agriculture, T. Kozai, K. Fujiwara, E. S. Runkle, Eds, Springer  
3 Singapore, 219–232 (2016).
- 4 19. C. Gómez, C. J. Currey, R. W. Dickson, H.-J. Kim, R. Hernández, N. C. Sabeh, R. E.  
5 Raudales, R. G. Brumfield, A. Laury-Shaw, A. K. Wilke, R. G. Lopez, S. E. Burnett,  
6 Controlled Environment Food Production for Urban Agriculture. *HortSci.* 54, 1448–1458  
7 (2019).
- 8 20. E. Hayashi, Current Status of Commercial Plant Factories with LED Lighting Market in  
9 Asia, Europe and Other Regions. In LED Lighting for Urban Agriculture, T. Kozai, K.  
10 Fujiwara, E. S. Runkle, Eds, Springer Singapore, 295–308 (2016).
- 11 21. M. Rehman, S. Ullah, Y. Bao, B. Wang, D. Peng, L. Liu, Light-emitting diodes: whether an  
12 efficient source of light for indoor plants? *Environ. Sci. Pollut. Res.* 24, 24743–24752  
13 (2017).
- 14 22. G. Cocetta, D. Casciani, R. Bulgari, F. Musante, A. Kołton, M. Rossi, A. Ferrante, Light  
15 use efficiency for vegetables production in protected and indoor environments. *Eur. Phys.*  
16 *J. Plus.* 132, 43 (2017).
- 17 23. C. A. Mitchell, F. Sheibani, LED advancements for plant-factory artificial lighting. In *Plant*  
18 *Factory, An Indoor Vertical Farming System for Efficient Quality Food Production*, T.  
19 Kosai, G. Niu, M. Takagaki, Eds, Academic Press Elsevier, 167–184 (2020).
- 20 24. Y. Park, E. S. Runkle, Spectral effects of light-emitting diodes on plant growth, visual color  
21 quality, and photosynthetic photon efficacy: White versus blue plus red radiation. *PLOS*  
22 *ONE.* 13, e0202386 (2018).
- 23 25. K.-H. Son, M.-M. Oh, Growth, photosynthetic and antioxidant parameters of two lettuce  
24 cultivars as affected by red, green, and blue light-emitting diodes. *Hortic. Environ.*  
25 *Biotechnol.* 56, 639–653 (2015).
- 26 26. C. S. Brown, A. C. Schuerger, J. C. Sager, Growth and Photomorphogenesis of Pepper  
27 Plants under Red Light-emitting Diodes with Supplemental Blue or Far-red Lighting. *J. Am.*  
28 *Soc. Hortic. Sci.* 120, 808–813 (1995).
- 29 27. X.-X. Fan, Z.-G. Xu, X.-Y. Liu, C.-M. Tang, L.-W. Wang, X. Han, Effects of light intensity  
30 on the growth and leaf development of young tomato plants grown under a combination of  
31 red and blue light. *Sci. Hortic.* 153, 50–55 (2013).
- 32 28. K. J. McCree, The action spectrum, absorptance and quantum yield of photosynthesis in  
33 crop plants. *Agric. Meteorol.* 9, 191–216 (1971).
- 34 29. E. Kaiser, K. Weerheim, R. Schipper, J. A. Dieleman, Partial replacement of red and blue  
35 by green light increases biomass and yield in tomato. *Sci. Hortic.* 249, 271–279 (2019).
- 36 30. S. Zhen, M. W. van Iersel, Far-red light is needed for efficient photochemistry and  
37 photosynthesis. *J. Plant Physiol.* 209, 115–122 (2017).
- 38 31. I. Terashima, T. Fujita, T. Inoue, W. S. Chow, R. Oguchi, Green Light Drives Leaf  
39 Photosynthesis More Efficiently than Red Light in Strong White Light: Revisiting the  
40 Enigmatic Question of Why Leaves are Green. *Plant Cell Physiol.* 50, 684–697 (2009).
- 41 32. S. Dutta Gupta, S. Pradhan, Regulation of Gene Expression by LED Lighting. In *Light*  
42 *Emitting Diodes for Agriculture*, S. Dutta Gupta, Ed., Springer, Singapore, 237–258 (2017).
- 43 33. T. A. Colquhoun, M. L. Schwieterman, J. L. Gilbert, E. A. Jaworski, K. M. Langer, C. R.  
44 Jones, G. V. Rushing, T. M. Hunter, J. Olmstead, D. G. Clark, K. M. Folta, Light modulation

- 1 of volatile organic compounds from petunia flowers and select fruits. *Postharvest Biol.*  
2 *Technol.* 86, 37–44 (2013).
- 3 34. Md. M. Hasan, T. Bashir, R. Ghosh, S. K. Lee, H. Bae, An Overview of LEDs' Effects on  
4 the Production of Bioactive Compounds and Crop Quality. *Molecules* 22, 1420 (2017).
- 5 35. H. Shimizu, Effect of Light Quality on Secondary Metabolite Production in Leafy Greens  
6 and Seedlings. In *LED Lighting for Urban Agriculture*, T. Kozai, K. Fujiwara, E. S. Runkle,  
7 Eds., Springer Singapore, 239–260 (2016).
- 8 36. O. Alrifai, X. Hao, M. F. Marcone, R. Tsao, Current Review of the Modulatory Effects of  
9 LED Lights on Photosynthesis of Secondary Metabolites and Future Perspectives of  
10 Microgreen Vegetables. *J. Agric. Food Chem.* 67, 6075–6090 (2019).
- 11 37. C. Costa, U. Schurr, F. Loreto, P. Menesatti, S. Carpentier, Plant Phenotyping Research  
12 Trends, a Science Mapping Approach. *Front. Plant Sci.* 9, 1933 (2019).
- 13 38. F. Tardieu, L. Cabrera-Bosquet, T. Pridmore, M. Bennett, Plant Phenomics, From Sensors  
14 to Knowledge. *Curr. Biol.* 27, R770–R783 (2017).
- 15 39. R. Pieruschka, U. Schurr, Plant Phenotyping: Past, Present, and Future. *Plant Phenomics.*  
16 Article ID 7507131 (2019).
- 17 40. C. Granier, L. Aguirrezabal, K. Chenu, S. J. Cookson, M. Dauzat, P. Hamard, J.-J. Thioux,  
18 G. Rolland, S. Bouchier-Combaud, A. Lebaudy, B. Muller, T. Simonneau, F. Tardieu,  
19 PHENOPSIS, an automated platform for reproducible phenotyping of plant responses to  
20 soil water deficit in *Arabidopsis thaliana* permitted the identification of an accession with  
21 low sensitivity to soil water deficit. *New Phytol.* 169, 623–635 (2006).
- 22 41. C. Reuzeau, V. Frankard, Y. Hatzfeld, A. Sanz, W. Van Camp, P. Lejeune, C. De Wilde,  
23 K. Lievens, J. de Wolf, E. Vranken, R. Peerbolte, W. Broekaert, Traitmill™: a functional  
24 genomics platform for the phenotypic analysis of cereals. *Plant Genet. Resour.* 4, 20–24  
25 (2006).
- 26 42. Y. Zhang, N. Zhang, Imaging technologies for plant high-throughput phenotyping: a review.  
27 *Front. Agric. Sci. Eng.* 5, 406–419 (2018).
- 28 43. M. R. Lien, R. J. Barker, Z. Ye, M. H. Westphall, R. Gao, A. Singh, S. Gilroy, P. A.  
29 Townsend, A low-cost and open-source platform for automated imaging. *Plant Methods.*  
30 15, 6 (2019).
- 31 44. S. A. Tsafaris, C. Noutsos, Plant Phenotyping with Low Cost Digital Cameras and Image  
32 Analytics. In *Information Technologies in Environmental Engineering. Environmental*  
33 *Science and Engineering*, I. N. Athanasiadis, A. E. Rizzoli, P. A. Mitkas, J. M. Gómez, Eds,  
34 Springer, Berlin, Heidelberg, 238–251 (2009).
- 35 45. N. Fahlgren, M. A. Gehan, I. Baxter, Lights, camera, action: high-throughput plant  
36 phenotyping is ready for a close-up. *Curr. Opin. Plant Biol.* 24, 93–99 (2015).
- 37 46. C. A. Schneider, W. S. Rasband, K. W. Eliceiri, NIH Image to ImageJ: 25 years of image  
38 analysis. *Nat. Methods.* 9, 671–675 (2012).
- 39 47. E. R. Hunt, C. S. T. Daughtry, J. U. H. Eitel, D. S. Long, Remote Sensing Leaf Chlorophyll  
40 Content Using a Visible Band Index. *Agron. J.* 103, 1090–1099 (2011).
- 41 48. S. W. Hogewoning, G. Trouwborst, H. Maljaars, H. Poorter, W. van Ieperen, J. Harbinson,  
42 Blue light dose-responses of leaf photosynthesis, morphology, and chemical composition  
43 of *Cucumis sativus* grown under different combinations of red and blue light. *J. Exp. Bot.*  
44 61, 3107–3117 (2010).

- 1 49. C. Piovene, F. Orsini, S. Bosi, R. Sanoubar, V. Bregola, G. Dinelli, G. Gianquinto, Optimal  
2 red:blue ratio in led lighting for nutraceutical indoor horticulture. *Sci. Hort.* 193, 202–208  
3 (2015).
- 4 50. M. Naznin, M. Lefsrud, V. Gravel, M. Azad, Blue Light added with Red LEDs Enhance  
5 Growth Characteristics, Pigments Content, and Antioxidant Capacity in Lettuce, Spinach,  
6 Kale, Basil, and Sweet Pepper in a Controlled Environment. *Plants* 8, 93 (2019).
- 7 51. H. Dou, G. Niu, M. Gu, J. Masabni, Morphological and Physiological Responses in Basil  
8 and Brassica Species to Different Proportions of Red, Blue, and Green Wavelengths in  
9 Indoor Vertical Farming. *J. Am. Soc. Hortic. Sci.* 145, 267–278 (2020).
- 10 52. R. M. Wheeler, C. L. Mackowiak, J. C. Sager, Soybean Stem Growth under High-Pressure  
11 Sodium with Supplemental Blue Lighting. *Agron. J.* 83, 903 (1991).
- 12 53. H. M. Wollaeger, E. S. Runkle, Growth and Acclimation of Impatiens, Salvia, Petunia, and  
13 Tomato Seedlings to Blue and Red Light. *HortSci.* 50, 522–529 (2015).
- 14 54. J. A. Dieleman, P. H. B. De Visser, E. Meinen, J. G. Grit, T. A. Dueck, Integrating  
15 Morphological and Physiological Responses of Tomato Plants to Light Quality to the Crop  
16 Level by 3D Modeling. *Front. Plant Sci.* 10, 839 (2019).
- 17 55. C. Barnes, B. Bugbee, Morphological Responses of Wheat to Blue Light. *J. Plant Physiol.*  
18 139, 339–342 (1992).
- 19 56. M. B. Mantilla-Perez, M. G. Salas Fernandez, Differential manipulation of leaf angle  
20 throughout the canopy: current status and prospects. *J. Exp. Bot.* 68, 5699–5717 (2017).
- 21 57. M. Asahina, Y. Tamaki, T. Sakamoto, K. Shibata, T. Nomura, T. Yokota, Blue light-  
22 promoted rice leaf bending and unrolling are due to up-regulated brassinosteroid  
23 biosynthesis genes accompanied by accumulation of castasterone. *Phytochem.* 104, 21–29  
24 (2014).
- 25 58. D. Milivojevic, K. Eskins, Effect of light quality (blue, red) and fluence rate on the synthesis  
26 of pigments and pigment-proteins in maize and black pine mesophyll chloroplasts. *Physiol.*  
27 *Plant.* 80, 624–628 (1990).
- 28 59. S. Paulus, A.-K. Mahlein, Technical workflows for hyperspectral plant image assessment  
29 and processing on the greenhouse and laboratory scale. *GigaScience.* 9, gaa090 (2020).
